## $\gamma$ HV ncRNAs share conserved features

1 **Title:** Gammaherpesvirus ncRNAs share conserved features of binding and virulence despite  
2 lack of sequence conservation

3 **Authors:** Ashley N. Knox<sup>a</sup>, Eva M. Medina<sup>b</sup>, Darby G. Oldenburg<sup>c</sup>, Eric T. Clambey<sup>d</sup>, Linda F.  
4 van Dyk<sup>a#</sup>

5 <sup>a</sup> Department of Immunology and Microbiology, University of Colorado Anschutz Medical  
6 Campus, Aurora, Colorado, USA

7 <sup>b</sup> Department of Neurology, University of Colorado Anschutz Medical Campus, Aurora,  
8 Colorado, USA

9 <sup>c</sup> Gundersen Health System, La Crosse, Wisconsin, USA

10 <sup>d</sup> Department of Anesthesiology, University of Colorado Anschutz Medical Campus, Aurora,  
11 Colorado, USA

12

13 #Address correspondence to Linda van Dyk, [linda.vandyk@cuanschutz.edu](mailto:linda.vandyk@cuanschutz.edu)

14

15 Running title:  $\gamma$ HV ncRNAs share conserved features

16

17 Abstract: 250 words

18 Importance: 135 words

19 Main text: 4439 words

20

21 **ABSTRACT**

22 Gammaherpesvirus ( $\gamma$ HV) non-coding RNAs (ncRNAs) are integral modulators of viral  
23 infection. The  $\gamma$ HVs engage RNA polymerase III (pol III)-dependent transcription of both host  
24 and viral ncRNAs, which contribute to viral establishment, gene expression, and pathogenesis.  
25 Viral ncRNAs, such as the EBV-encoded RNAs (EBERs), reportedly interact with multiple host  
26 RNA-binding proteins (RBPs) and contribute to inflammatory responses implicated in the  
27 development of malignancies. Here, we examined RBP interactions of the pol III-transcribed  
28 tRNA-miRNA encoded non-coding RNAs (TMERs) of murine  $\gamma$ HV68, and the potential  
29 contributions of these and the related EBERs to *in vivo* pathogenesis. Using sequential enzymatic  
30 treatments, we found that several TMER1 forms retain a 5'-triphosphate, lending the possibility  
31 of recognition by the innate immune sensor RIG-I. We further examined the interactions of  
32 TMERs and EBERs with host RBPs, and found that multiple TMERs and EBERs interact with  
33 the La protein, though minimal interaction was detected with RIG-I during primary virus  
34 infection. Finally, we investigated the contributions of the TMERs and EBERs to disease in an  
35 immune-compromised mouse model with a series of viral recombinants. We found that  
36 expression of multiple single TMERs, or the EBERs expressed in place of the TMERs, was  
37 capable of restoring virulence to a viral recombinant lacking expression of all TMERs.  
38 Ultimately, these studies demonstrate that divergent pol III-transcribed  $\gamma$ HV ncRNAs share  
39 interaction characteristics with two host RBPs and conserved contributions to disease, despite  
40 little to no significant sequence conservation. These findings support a model of convergent  
41 functions of the sequence-variable pol III-transcribed  $\gamma$ HV ncRNAs.

## 42 **IMPORTANCE**

43 Viruses manipulate the infected cell and host inflammatory responses through expression of  
44 coding and non-coding RNAs. The gammaherpesviruses are a subfamily of herpesviruses  
45 associated with chronic inflammatory diseases and malignancies, especially in immune-  
46 compromised individuals. Among these, the human Epstein-Barr virus and murine  
47 gammaherpesvirus 68 ( $\gamma$ HV68) express highly abundant, RNA polymerase III-dependent, short  
48 non-coding RNAs. Whether these sequence-divergent ncRNAs have conserved functional  
49 properties is unknown. By using viral recombinants to allow direct comparison of these ncRNAs  
50 during primary infection, we find that the sequence-divergent ncRNAs of  $\gamma$ HV68 and EBV share  
51 a conserved property to bind to the host RNA binding protein, La, and function interchangeably  
52 to facilitate *in vivo* pathogenesis. These studies demonstrate that abundant, RNA polymerase III-  
53 dependent viral ncRNAs can potently function to alter the host cell landscape and promote  
54 disease in a sequence-independent manner.

## 55 **INTRODUCTION**

56 The gammaherpesviruses ( $\gamma$ HVs) are DNA viruses that establish life-long infection in a  
57 lymphocyte reservoir within their hosts (1, 2). The human-specific  $\gamma$ HVs include Kaposi's  
58 sarcoma associated herpesvirus (KSHV or HHV-8) and Epstein-Barr virus (EBV or HHV-4).  
59 Murine gammaherpesvirus 68 (MHV68 or  $\gamma$ HV68; ICTV nomenclature *Murid herpesvirus 4*,  
60 MuHV-4) serves as a small animal model of  $\gamma$ HV infection and pathogenesis (3, 4). Primary  
61 infection with the  $\gamma$ HVs is characterized by high viral gene expression and production of new  
62 virions. Following resolution of this lytic phase, the virus is maintained in a latent state, during  
63 which viral gene expression is low and new virions are not produced. Latency is maintained  
64 through the establishment of an equilibrium between the virus and the host immune system in

## $\gamma$ HV ncRNAs share conserved features

65 healthy immune-competent hosts; however, disruption of this balance is associated with virus  
66 reactivation, leading to a range of malignancies (5).

67 The  $\gamma$ HVs express several types of non-coding RNAs (ncRNAs) that play important roles  
68 in the virus lifecycle. Interestingly, some  $\gamma$ HV ncRNAs are transcribed by RNA polymerase III  
69 (pol III), lending them unique transcriptional regulation and characteristics. The  $\gamma$ HV68 tRNA-  
70 miRNA-encoded RNAs (TMERs; TMER1-TMER8) are expressed during lytic and latent  
71 infection (6). The TMERs are dispensable for lytic replication and the establishment of latency,  
72 but required for pathogenesis (7, 8). The EBV-encoded small RNAs (EBERs; EBER1 and  
73 EBER2) are also expressed during both lytic and latent infection and have been shown to interact  
74 with several host proteins, including ribosomal protein L22, protein kinase R (PKR), lupus-  
75 associated antigen (La), and retinoic acid-inducible gene I (RIG-I) (9). Interactions between  
76 EBERs and host proteins can trigger sustained host innate immune responses that are implicated  
77 in the development of EBV-associated malignancies (10-13), highlighting an integral role of pol  
78 III-transcribed RNAs in  $\gamma$ HV pathogenesis.

79 Certain host RNA-binding proteins (RBPs) are predicted to bind the EBV EBERs  
80 through features that are necessarily imparted by pol III transcription (14). Unlike RNA pol II-  
81 transcribed RNAs, pol III transcripts are not modified to add a 5' 7-methylguanine cap, leaving a  
82 5'-triphosphate on pol III-transcribed primary RNAs (14, 15). Pol III transcription is terminated  
83 by a stretch of thymine residues, transcribed to a 3'-polyU sequence (16, 17). Additionally, the  
84 predicted secondary structures of EBER1 and EBER2 include sections of double-stranded RNA  
85 (dsRNA) (18). The innate immune sensor RIG-I binds to RNAs with a 5'-triphosphate and  
86 dsRNA, and the La protein binds 3'-polyU sequences characteristic of all pol III-transcribed  
87 primary RNAs (16, 17, 19, 20). EBER interaction with RIG-I reportedly induces type I interferon

## $\gamma$ HV ncRNAs share conserved features

88 and IL-10 signaling, while binding of EBERs with La initially facilitated EBER discovery and  
89 putatively mediates interaction with TLR3, leading to type I interferon and inflammatory  
90 cytokine responses (10-13, 21, 22). Due to the strict human-specificity of EBV, these studies  
91 largely rely on the analysis of patient samples or the comparison of established EBV-negative  
92 and EBV-positive transformed cell lines that are latently infected. Therefore, the understanding  
93 of EBER interactions with host proteins during primary lytic infection is limited.

94 Like the EBV EBERs, the  $\gamma$ HV68 TMERs are transcribed by pol III (23). These  
95 bifunctional RNAs contain a 5' tRNA-like structure followed by multiple hairpins that are  
96 processed into biologically active miRNAs (8, 24-26). Sequence-dependent targets of the TMER  
97 miRNAs are highly conserved with KSHV and EBV, and include pathways in host translation  
98 and protein modification (27). Our previous work characterizing a  $\gamma$ HV68 recombinant lacking  
99 expression of all eight TMERs (TMER total knock-out, TMER-TKO  $\gamma$ HV68) demonstrated the  
100 dispensability of TMERs for lytic replication, while highlighting the requirement of TMERs for  
101 optimal virulence in an acute pneumonia model (7). Furthermore, expression of the tRNA-like  
102 portion of TMER1, in the absence of any  $\gamma$ HV68 miRNAs, restored pathogenesis. Our data  
103 suggest that the tRNA-like sections of the TMERs act as sequence-independent modulators of  
104 infection, potentially through interactions with host RBPs.

105 Due to the similarities between the EBERs and TMERs (pol III transcription and  
106 predicted dsRNA secondary structure), host RBP interactions with EBERs imply similar  
107 interactions with TMERs. However, unlike EBERs, TMERs undergo extensive processing that  
108 result in multiple forms that may differ in their capacity as ligands for host RBPs. The tRNA-like  
109 portion of the TMERs has been shown to be processed into a mature, non-aminoacylated tRNA  
110 (24), and TMERs contain alternate transcription terminators and hairpins that are processed into

## $\gamma$ HV ncRNAs share conserved features

111 miRNAs (8, 28). Whether the various forms of TMERs maintain characteristics that are  
112 recognized by host RBPs like RIG-I and La remains unknown. Our previous work using reverse  
113 ligation mediated reverse transcription PCR (RLM RT-PCR) indicates the presence of 5'-  
114 monophosphate on some mature TMER miRNAs (8), however, characterization of the 5'-end of  
115 the primary TMERs has not yet been reported.

116 Identifying interactions between  $\gamma$ HV ncRNAs and host RBPs is integral to  
117 understanding the role of  $\gamma$ HV ncRNAs in host immune modulation and pathogenesis. By  
118 analyzing the modifications on the  $\gamma$ HV68 TMERs, we found evidence that some species retain a  
119 5'-triphosphate end, indicating the potential of these RNAs to bind to RIG-I. Subsequent studies  
120 found that the TMERs and EBERs bound to multiple RBPs with varying stringency, with a  
121 particular robust interaction observed with the La RBP. Our data further indicate that while the  
122 EBERs and TMERs lack sequence conservation, both classes of  $\gamma$ HV ncRNAs share the capacity  
123 to enhance *in vivo* pathogenesis in an acute model of  $\gamma$ HV disease. Ultimately, our studies show  
124 that the pol III-transcribed  $\gamma$ HV ncRNAs lack sequence conservation, but have shared binding  
125 characteristics with two host RBPs and drive pathogenesis.

## 126 **RESULTS**

### 127 **5'-end characterization demonstrates $\gamma$ HV68 TMERs with 5'-triphosphate ends.**

128 To investigate potential interactions of the  $\gamma$ HV68 ncRNAs with the innate immune  
129 sensor, RIG-I, we sought to characterize the 5' RNA ends using a previously published  
130 sequential enzymatic assay (29). Small RNAs were isolated and size fractionated from HEK 293  
131 cells 24 hours after mock treatment or after infection with WT or TMER1-only  $\gamma$ HV68. The  
132 TMER1-only  $\gamma$ HV68 was previously characterized, and only expresses TMER1 but no other  
133 TMERs, allowing for specific analysis of an individual TMER (7). All RNAs smaller than 300

## $\gamma$ HV ncRNAs share conserved features

134 nucleotides (Fig 1A) were subjected to three different enzyme treatments; 1) RNA 5'-  
135 polyphosphatase only, 2) Terminator™ only, or 3) RNA 5'-polyphosphatase followed by  
136 Terminator™ (Fig 1B). Untreated RNA was included as a control. RNA 5'-polyphosphatase  
137 converts 5'-triphosphate to 5'-monophosphate RNAs, and Terminator™ is a 5'-monophosphate-  
138 dependent exonuclease. Therefore, we expect any RNAs with a 5'-triphosphate to resist  
139 degradation when treated only with Terminator™ enzyme (identified as “-/+”, Fig 1B), but to be  
140 sensitized to Terminator™ degradation when first treated with RNA 5'-polyphosphatase (“+/+”).  
141 These two populations are highlighted in blue boxes throughout Figures 1 and 2 to indicate  
142 which populations were compared to detect the presence of 5'-triphosphate RNAs.

143 We first characterized the human (host) tRNA-Valine and 5S rRNA (Fig 1C-D)  
144 following sequential enzyme treatment. Specific RNAs were detected by northern blot probes  
145 (Table 1) and the density of each population was normalized to an ethidium bromide-stained 5S  
146 rRNA control. To determine how each RNA responded to enzyme treatment, the band density of  
147 each enzyme-treated population was calculated as the fold change of the untreated population (-/-  
148 ), which was set to 1. Fold changes are presented as heat maps (Fig 1C-D). Our analysis indicates  
149 complete degradation of the host tRNA following treatment with Terminator™ (Fig 1B-C), as  
150 expected due to rapid processing of tRNA 5' ends by RNase P (reviewed in (30)). Interestingly,  
151 there was no significant degradation of the human 5S rRNA following both enzyme treatments,  
152 despite a well characterized 5'-triphosphate end and a previous report showing significant 5S  
153 rRNA degradation following both enzyme treatments (29). The difference in our analysis may be  
154 due to lower sensitivity of the assay, and considering that 5S rRNA is a highly abundant  
155 transcript, any degradation in this population may fall below our limit of detection.

## $\gamma$ HV ncRNAs share conserved features

156 We then used sequential enzymatic treatment to characterize the 5' end of the most  
157 abundant  $\gamma$ HV68 TMER, TMER1. The predicted secondary structure of TMER1 RNA is shown  
158 in Fig 2A with the location of the northern probe indicated (Probe 1). The TMER1 gene contains  
159 two alternative transcriptional termination sites, and can be processed into a tRNA-like 5'  
160 portion and multiple hairpins that give rise to biologically active miRNAs (8, 24, 28). These  
161 characteristics result in multiple possible forms of TMER1 RNA with various lengths, some of  
162 which are detected with Probe 1 as indicated (Fig 2B). Following sequential enzyme treatment as  
163 previously described, TMER1 RNA was detected by northern blot (Fig 2C). Mock-treated  
164 samples indicate some off-target bands, while several RNA populations were only detected in the  
165 WT and TMER1-only  $\gamma$ HV68 infected samples specific to TMER1 (Fig 2C, red arrows). As  
166 expected, we detected TMER1 RNA at multiple sizes consistent with known alternative forms of  
167 TMER1. We previously observed that TMER1 is expressed more abundantly during infection  
168 with TMER1-only recombinant virus compared to WT virus (7), as observed here where TMER1  
169 RNA is more abundant in TMER1-only than WT  $\gamma$ HV68-infected samples. Density analysis was  
170 performed on each band (standardized using an RNA ladder) and presented as the fold change  
171 compared to the untreated RNA population as an average across three independent experiments  
172 (Fig 2D). Notably, several TMER1 populations displayed increased Terminator™ degradation  
173 following pretreatment with RNA 5'-polyphosphatase, indicating the presence of 5'-  
174 triphosphates on some TMER1 RNAs (e.g. the ~195 nt species of TMER1, Fig 2D). Analysis of  
175 TMER1 RNAs with other northern probes (Fig S1) provides further evidence of 5'-triphosphate  
176 containing TMER1 RNAs (e.g. the ~195 nt band, Fig S1D-G).

177 The  $\gamma$ HV68 TMERs show conservation of predicted secondary structures, and therefore  
178 we extended our 5' characterization analysis to determine whether 5' ends differ or are consistent



## $\gamma$ HV ncRNAs share conserved features

179 across multiple TMERs. As with TMER1, northern probe sequences in TMER4 or TMER5 bind  
180 multiple processed forms, resulting in several band sizes detected by northern blot. Band density  
181 analysis did not indicate the presence of TMER4 or TMER5 species maintaining a 5'-  
182 triphosphates (Fig S2). Our characterization of TMER1 RNA benefited from the use of the  
183 TMER1-only recombinant virus, which resulted in more abundant TMER1 RNA and more  
184 sensitive TMER1 detection (Fig 2C northern blots from TMER1-only infection vs WT  
185 infection). However, our characterization of TMER4 and TMER5 relied solely on WT  $\gamma$ HV68-  
186 infected samples, as the TMER4 and TMER5 only recombinants were not yet available at the  
187 time of this analysis. Future studies with additional  $\gamma$ HV68 recombinants may facilitate more  
188 detailed 5' end characterization of these TMERs.

### 189 **TMER and EBER ncRNAs are detected in RIG-I and La immunoprecipitated complexes** 190 **under permissive conditions.**

191 Detection of 5'-triphosphate TMERs suggests these RNAs are potential ligands for host  
192 retinoic acid inducible gene I (RIG-I), a pattern recognition receptor previously reported to bind  
193 double-stranded RNA with 5'-triphosphates to induce innate immune pathways (19, 20). The  
194 TMERs and EBERs are transcribed by RNA polymerase III (pol III), and therefore end with 3'-  
195 oligouridylate (3'-poly(U)) for potential binding to host La protein (16, 17). Considering these  
196 characteristics of the  $\gamma$ HV68 TMERs and previous EBER reports, we investigated whether they  
197 interact with the host RBPs RIG-I and La.

198 We transfected HEK 293 cells with plasmids expressing either FLAG-tagged RIG-I or La  
199 (Fig 3A). One set of samples were also transfected with an EBER-expressing plasmid to  
200 compare the different  $\gamma$ HV ncRNAs. Following transfection, cells were infected with either the  
201 TMER1-only  $\gamma$ HV68 or a previously characterized viral recombinant that does not express any

## $\gamma$ HV ncRNAs share conserved features

202 of the TMERs (TMER-total knockout, TMER-TKO  $\gamma$ HV68). The EBER-plasmid transfected  
203 cells were infected with the TMER-TKO  $\gamma$ HV68 to provide shared infection conditions with  
204 only EBER ncRNAs. Cell lysates were collected 24 hpi and immunoprecipitated with FLAG-  
205 specific magnetic beads. To maximally detect viral ncRNAs potentially bound to host RBPs, we  
206 first examined permissive conditions, in which the immunoprecipitates were washed three times  
207 with TBS. A fraction of the IP complexes were analyzed by western and remaining beads were  
208 subjected to TRIzol for RNA isolation. Western blots confirmed the effective purification of the  
209 intended host proteins (Fig 3B). Isolated RNA analyzed by reverse transcription polymerase  
210 chain reaction (RT-PCR) with primers targeting either TMER1 or EBER1 demonstrated that  
211 both  $\gamma$ HV ncRNAs were detected in the RIG-I and La immunoprecipitates under conditions of  
212 low stringency washes and high cycle number (Fig 3C). We extended this analysis to another  
213 highly expressed  $\gamma$ HV68 ncRNA, TMER5. HEK 293 cells were treated as before, but were also  
214 infected cells with the WT  $\gamma$ HV68, which expresses all TMERs. We found that TMER5 was also  
215 detected in these host RBP immunoprecipitates with low-stringency washes and high cycle  
216 number (Fig S3A-B). Together, these studies suggested that the  $\gamma$ HV TMERs and EBERs are  
217 alike in their relative binding to the RBPs La and RIG-I during primary infection.

### 218 **TMER and EBER ncRNA bind to La, but not RIG-I, under stringent conditions.**

219        Though we were able to detect multiple TMERs and EBER1 in RIG-I and La  
220 immunoprecipitates, we wanted to further examine the specificity and strength of these  
221 interactions in a highly stringent, quantitative analysis. Therefore, we modified the  
222 immunoprecipitation procedure to include a control protein not known to bind RNA (FLAG-  
223 tagged GFP) and stringent wash conditions following immunoprecipitation (Fig 4A).  
224 Additionally, we used a new  $\gamma$ HV68 recombinant that expresses both EBV EBERs in place of

## $\gamma$ HV ncRNAs share conserved features

225 the TMERs. The EBER-knock in (EBER-KI)  $\beta$ la. $\gamma$ HV68 virus expresses both EBERs in place of  
226 the TMERs but maintains the rest of the  $\gamma$ HV68 genome, allowing us to examine the function of  
227 EBERs in *de novo*  $\gamma$ HV infection. We previously reported that EBER-KI  $\beta$ la. $\gamma$ HV68 infects  
228 murine fibroblast cells and expresses EBERs without any detectable TMER expression as  
229 measured by RNA-based flow cytometry (31). With this tool established, we infected HEK 293  
230 cells with WT or EBER-KI  $\beta$ la. $\gamma$ HV68 and performed immunoprecipitation of FLAG-tagged  
231 proteins as before, but following IP, bead-protein complexes were subjected to a stringent wash  
232 step consisting of three washes with lysis buffer followed by two washes with a high-salt buffer  
233 (Fig 4A, red box), based on previously published wash conditions for RIG-I bound RNAs during  
234 HSV-1 infection (32). Samples were analyzed by western blot to confirm effective  
235 immunoprecipitation (Fig 4B).

236 RNA isolated from immunoprecipitates was initially subjected to RT-PCR with primers  
237 targeting TMER1 or EBER1 (Fig 5A-B) and a limited number of RT-PCR cycles. We reasoned  
238 that meaningful interaction between the  $\gamma$ HV ncRNAs and the RBPs of interest would result in  
239 an enriched signal in IP samples compared to total RNA samples, and non-specific interactions  
240 would fall below the limit of detection. Under these conditions, we detected strong interactions  
241 of both TMER1 (Fig 5A) and EBER1 (Fig 5B) with the La protein; however, both  $\gamma$ HV ncRNAs  
242 demonstrated signal with FLAG-RIG-I that was at or below the signal observed with the FLAG-  
243 GFP negative control. To determine if these observations were common across other  $\gamma$ HV  
244 ncRNAs, we repeated semi-quantitative RT-PCR analysis with primers targeting TMER4 (Fig  
245 5C) and EBER2 (Fig 5D). We found that TMER4 and EBER2 were strongly detected from La  
246 but not RIG-I samples, suggesting that both TMERs and EBERs consistently interact with the La  
247 protein during *de novo* primary  $\gamma$ HV infection (Fig 5C-D).

## $\gamma$ HV ncRNAs share conserved features

248 To further quantify these interactions, we measured TMER1 and EBER1 using  
249 quantitative RT-PCR (RT-qPCR). RNA samples that were determined to be free of DNA  
250 contamination by comparable RT-PCR and PCR reactions were converted to cDNA, prior to  
251 TMER1 or EBER1 measurement by SYBR Green RT-PCR. The  $\Delta$ Ct values for TMER1 (Fig  
252 5E) or EBER1 (Fig 5G) in GFP, RIG-I, and La samples were calculated by normalizing  
253 immunoprecipitated Ct values to total RNA Ct values, then subtracting the corresponding  
254 normalized Ct values for GFP samples. We found enrichment of both TMER1 and EBER1 in La  
255 samples compared to the negative control GFP samples; however, we did not detect significant  
256 enrichment in RIG-I samples (Fig 5E-F, left graphs). These observations were further  
257 corroborated when we then calculated the fold enrichment as  $2^{\Delta Ct}$  for TMER1 and EBER1 (Fig  
258 5E-F, right graphs). These data demonstrate that the  $\gamma$ HV68 TMERs and EBV EBERs share a  
259 robust and specific interaction with the La protein during *de novo* primary infection.

### 260 $\gamma$ HV68 ncRNA recombinants expressing individual TMERs or EBERs show normal 261 replication *in vitro*.

262 To better understand the specificity or redundancy of  $\gamma$ HV ncRNAs, we next established  
263 a panel of  $\gamma$ HV68 recombinants engineered to express individual TMERs or the EBERs. These  
264  $\gamma$ HV68 recombinants include TMER4-only, TMER5-only, TMER8-only, and the previously  
265 mentioned EBER-KI  $\gamma$ HV68 (schematics in Fig 6A). Each recombinant was confirmed by  
266 restriction digestion and sequencing of the left end of the virus. The bacterial artificial  
267 chromosome (BAC) DNAs used to generate recombinants were confirmed by PCR analysis for  
268 expected correct ncRNA sequence (Fig 6B). Expression of the intended ncRNAs with these new  
269 recombinants was confirmed by RT-PCR of RNA isolated from infected HEK 293 cells (Fig  
270 6C). Finally, the replication kinetics of each recombinant was compared to WT virus by single-

## $\gamma$ HV ncRNAs share conserved features

271 step replication analysis, studies that demonstrated comparable *in vitro* replication between this  
272 series of recombinants (Fig 6D), indicating that the expression of any single TMER or the  
273 EBERs in place of the WT TMERs had a negligible impact on replication fitness *in vitro*. This  
274 observation is consistent with our previous report that the TMERs are dispensable for lytic  
275 replication (7).

### 276 **The $\gamma$ HV TMER and EBER ncRNAs share capacity for virulence *in vivo*.**

277 To study how the individual  $\gamma$ HV ncRNAs recombinants replicate and contribute to  
278 virulence *in vivo*, we infected interferon gamma deficient (BALB.IFN- $\gamma^{-/-}$ ) mice with the panel of  
279 viral recombinants and measured lung viral titer and survival. WT  $\gamma$ HV68 has previously been  
280 demonstrated to cause acute pneumonia in BALB.IFN- $\gamma^{-/-}$  mice, resulting in a high mortality rate  
281 by 14 days post-infection (33). However, mice inoculated with a  $\gamma$ HV68 mutant with a 9,473-bp  
282 left-end deletion (which removes all eight TMERs, M1, M2, M3, and part of M4) display fully-  
283 attenuated pathogenesis, showing that viral genes in the left end of the genome are required for  
284 pathogenesis (33, 34). Studies of the BALB.IFN- $\gamma^{-/-}$  model further showed that infection with the  
285  $\beta$ la. $\gamma$ HV68 TMER-TKO results in reduced virulence compared to WT  $\beta$ la. $\gamma$ HV68, and  
286 expression of a single TMER ( $\gamma$ HV68. $\beta$ la TMER1-only) or the tRNA-like portion of TMER1  
287 alone ( $\gamma$ HV68. $\beta$ la vtRNA1-only) reverses the pathogenic deficit of the TMER-TKO virus (7).  
288 This previous study showed that the expression of only TMER1 is sufficient for virulence in the  
289 acute pneumonia mouse model. To determine if this pathogenic capacity is unique to TMER1 or  
290 a shared feature of  $\gamma$ HV ncRNAs, we tested the new viral recombinants that express different  
291 single TMERs or both EBERs. BALB.IFN- $\gamma^{-/-}$  mice were intranasally inoculated with each viral  
292 recombinant ( $4 \times 10^5$  pfu/mouse) for analysis of *in vivo* replication from infected lung tissue 8  
293 days p.i. by qPCR for viral DNA (gB sequence; Fig 7A) or by plaque assay (Fig 7B). We found

## $\gamma$ HV ncRNAs share conserved features

294 no significant difference in *in vivo* replication among the viral recombinants, indicating  
295 equivalent replication *in vivo*. Inoculated BALB.IFN- $\gamma^{-/-}$  mice were then monitored over the  
296 course of 15 days p.i. to determine morbidity in the pneumonia model (Fig 7C). The TMER-  
297 TKO  $\beta$ la. $\gamma$ HV68-infected mice showed significantly higher survival rate after 15 days than the  
298 WT  $\beta$ la. $\gamma$ HV68-infected mice, consistent with a previous report (7). Notably, all four of the new  
299 ncRNA  $\beta$ la. $\gamma$ HV68 recombinants showed no significant difference in pathogenesis compared to  
300 WT  $\beta$ la. $\gamma$ HV68. These results indicate that despite unique sequences across viral ncRNA genes,  
301 each individual viral ncRNA (TMER 4, 5, or 8) or the EBERs in place of the TMERs share the  
302 ability to promote *in vivo* virulence in an acute pneumonia model.

## 303 **DISCUSSION**

304 The  $\gamma$ HVs express a diverse set of RNAs that both promote viral propagation and lifelong  
305 infection, and actively engage with and manipulate host cell machinery. Among these, the  $\gamma$ HV  
306 non-coding RNAs, including the EBV EBERS and the  $\gamma$ HV68 TMERs, are short non-coding  
307 RNAs transcribed by RNA polymerase III. Notably, their expression by RNA pol III likely  
308 endows these RNAs with distinct features, including a 5'-triphosphate and 3'-poly U tract, that  
309 afford the opportunity of these RNAs to interact with host RNA binding proteins. Indeed,  
310 previous studies on the EBV EBERS have demonstrated that these RNAs can engage with both  
311 RIG-I, an innate immune sensor that can bind to RNAs containing a 5'-triphosphate, and La, a  
312 host RBP that can bind to 3'-poly U tracts (12, 21). While the EBERS and the TMERs are both  
313 abundant small, pol III-transcribed ncRNAs, and are predicted to include double-strand RNA  
314 segments, these RNAs do not have significant sequence similarity. The TMERs further  
315 demonstrate unique characteristics not reported for the EBV EBERS, encompassing bifunctional  
316 elements (i.e. a 5' tRNA-like structure and 3' microRNAs) and substantial post-transcriptional

## $\gamma$ HV ncRNAs share conserved features

317 processing into multiple distinct RNA species (as described in Fig 2 and (8)). Though the viral  
318 tRNA-like structures are processed into mature tRNAs with a 3'-CCA addition, they are not  
319 aminoacylated, indicating they are very unlikely to directly influence translation (24). Given that  
320 the TMERs and EBERs are expressed by two related  $\gamma$ HVs that are studied in distinct  
321 experimental contexts, whether there are conserved biochemical or functional properties between  
322 the EBERs and the TMERs remains poorly understood at this time.

323 Here, we sought to biochemically characterize the TMERs and determine whether the  
324 TMERs and the EBERs share conserved binding properties to the host RBPs, RIG-I and La, and  
325 conserved functional properties *in vivo*. To do this, we have leveraged the unique strengths of the  
326  $\gamma$ HV68 system, a small animal model of  $\gamma$ HV infection and pathogenesis that allows us to study  
327 these questions in the context of primary, *de novo*  $\gamma$ HV68 infection. Our studies revealed three  
328 major findings about the TMERs and EBERs. First, we present evidence that multiple TMER-  
329 derived RNAs contain at least a portion of RNAs with a 5'-triphosphate, demonstrated by the  
330 sensitivity of certain RNAs to Terminase-mediated degradation only after treatment with RNA-  
331 polyphosphatase, building on a previously established method (29). Second, we demonstrate that  
332 both the TMERs and EBERs are capable of binding to RIG-I and La during primary infection,  
333 but that the strength and/or magnitude of interaction is much greater with the La protein. Third,  
334 we report that expression of an individual TMER (TMER 4, 5 or 8), or the EBV EBERs, is  
335 capable of restoring the defect in virulence observed in a  $\gamma$ HV68 recombinant lacking all 8  
336 TMERs. These studies extend our previous findings that expression of either TMER1, or the  
337 tRNA-like portion and partial stem of TMER1, is sufficient to confer virulence. In combination,  
338 these studies suggest that miRNA-independent, sequence-diverse features of the TMERs can  
339 facilitate pathogenesis in an immune-compromised mouse model (7). The ability of the EBV

## $\gamma$ HV ncRNAs share conserved features

340 EBERs to restore virulence is consistent with a recent report of an independent single EBER-  
341 knock-in  $\gamma$ HV68 recombinant capable of restoring certain deficits of primary infection observed  
342 when using a virus that lacks certain TMERs (35). More broadly, these studies suggest that  
343 multiple  $\gamma$ HV ncRNAs possess a functionally conserved ability to enhance *in vivo* pathogenesis  
344 in an immune-compromised mouse model (7), a property that may be linked to conserved  
345 interactions with host RBPs.

346         Although our data demonstrate that the EBERs and TMERs have certain conserved  
347 biochemical and functional properties, it is important to acknowledge that this does not mean  
348 that individual viral ncRNAs don't have unique functions as well. For the EBV EBERs, multiple  
349 reports have demonstrated that EBER1 and EBER2 have unique binding partners and functions  
350 are not simply redundant elements (36-38). For the TMERs, it is notable that each of the 8  
351 TMERs encodes 1-2 distinct miRNAs, with a range of targets (27, 39). In addition, mutagenesis  
352 studies have identified a specific role for TMER4 in promoting hematogenous dissemination of  
353  $\gamma$ HV68 during primary infection *in vivo* (35), a function that can be restored by EBER1 but not  
354 another viral pol III-transcribed ncRNA, adenovirus VAI (40). These studies, in combination  
355 with data presented here demonstrating conserved biochemical and functional characteristics,  
356 strongly suggest that these viral ncRNAs make both unique and redundant contributions to  
357 enhance  $\gamma$ HV infection. We anticipate that the continued analysis of the viral ncRNA  
358 recombinants presented here will enable new insights into conserved and functionally redundant  
359 properties of these ncRNAs, and will complement ongoing studies in which individual ncRNAs  
360 are specifically disrupted in the context of the virus (40-42).

361         Our studies raise a number of important future questions. *First, what are the conserved*  
362 *functional properties and targets of the TMERs or EBERs that promote in vivo pathogenesis?*



## $\gamma$ HV ncRNAs share conserved features

363 Our studies implicate possible pol III-RNA associated features (e.g. 3'-poly U tract) as one  
364 potentially conserved mechanism by which these ncRNAs may engage host pathways and  
365 influence the host inflammatory or immune response. A top candidate in this regard is the  
366 conserved binding of the TMERs and EBERs to La, a condition we observed under stringent  
367 wash conditions. Studies on the EBERs have indicated that EBER/La complexes can serve as  
368 TLR3 ligands, to engage the innate immune response (10, 11, 22). Whether this process occurs  
369 during  $\gamma$ HV68 infection, and what genetic contribution this putative pathway has on the outcome  
370 of infection remains an important and unresolved question that is uniquely capable of being  
371 addressed using the  $\gamma$ HV68 system, leveraging our panel of ncRNA recombinants. Another  
372 important property of the TMERs and the EBERs that cannot be ignored is that these RNAs are  
373 extremely abundant, potentially altering the host cell by overwhelming or outcompeting host  
374 processing machinery and innate immune sensing pathways (32, 43). In this later model,  
375 modulating or antagonizing viral ncRNA abundance would be predicted to blunt the effects of  
376 these ncRNAs, a potential future therapeutic opportunity. *A second major question that these*  
377 *studies raise is what impact, if any, does cellular context and state of infection (i.e. lytic vs. latent*  
378 *infection) have on ncRNA/host RBP interactions and ncRNA function?* Here, our studies focused  
379 on primary *de novo in vitro* infection of fibroblasts and *in vivo* infection, in which multiple cell  
380 types are lytically infected with little to no latent infection. Whether viral ncRNA/host RBP  
381 interactions vary as a function of cell type or during lytic versus latent infection is a vital  
382 question to understand the complexity of host engagement by these ncRNAs, and will likely  
383 reveal context-specific regulation of these ncRNAs and their interactions.

384 In conclusion, our studies on two distinct classes of  $\gamma$ HV ncRNAs, the TMERs and  
385 EBERs, demonstrate that these ncRNAs have conserved biochemical and functional features,

## $\gamma$ HV ncRNAs share conserved features

386 including the ability to interact with the host RNA-binding protein, La, and to enhance virulence  
387 in an *in vivo* model of  $\gamma$ HV pathogenesis. The conserved properties of these RNAs despite  
388 significant sequence divergence strongly supports the concept that a major biological function of  
389 these ncRNAs is mediated either through conserved biochemical or structural features or as a  
390 consequence of the unique abundance of these viral RNAs, expressed throughout the viral life  
391 cycle. We anticipate that future studies leveraging the unique strengths of this experimental  
392 system will allow us to critically assess both unique and conserved features of individual viral  
393 ncRNAs *in vitro* and *in vivo*.

## 394 **METHODS**

395 **Viruses and tissue culture.** Human endothelial kidney (HEK 293) and murine fibroblast  
396 3T12 cells (ATCC CCL-164) were cultured in Dulbecco's modified Eagle medium (DMEM;  
397 Life Technologies) supplemented with 5% fetal bovine serum (FBS; Atlanta Biologicals), 2 mM  
398 L-glutamine, 10 U/ml penicillin, and 10  $\mu$ g/ml streptomycin sulfate (complete DMEM,  
399 cDMEM). Vero-cre cells (gift from David Leib at Dartmouth School of Medicine) were grown  
400 in complete DMEM with 10% FBS. Cells were cultured at 37°C with 5% CO<sub>2</sub>.

401 All viruses and recombinants were derived from  $\gamma$ HV68 strain WUMS (ATCC VR-1465)  
402 (44). Mutants were created using a BAC harboring wild-type  $\gamma$ HV68 (45) or  $\gamma$ HV68.ORF73 $\beta$ la  
403 (referred to subsequently as  $\gamma$ HV68. $\beta$ la) (46). TMER-TKO and TMER1-only  $\gamma$ HV68. $\beta$ la were  
404 previously characterized (7), and new  $\gamma$ HV68 recombinant viruses were generated via *en*  
405 *passant mutagenesis* (47). The  $\gamma$ HV68. $\beta$ la TMER4-only, TMER5-only, TMER8-only, and  
406  $\gamma$ HV68. $\beta$ la EBER-knock in mutants were generated by Gibson assembly of two synthetic DNA  
407 fragments (gBLOCKS: New England Biolabs) followed by PCR and subsequent electroporation  
408 of the assembled and PCR-amplified fragments into E. coli strain GS 1783.5 harboring the

## $\gamma$ HV nCRNAs share conserved features

409  $\gamma$ HV68. $\beta$ 1a BAC. The presence of the individual TMERs and the EBER knock-in was verified by  
410 sequencing across the locus. For the EBER-knock in mutant, we replaced 563bp of the WT  
411  $\gamma$ HV68 TMER 1-2 region with 502 bp of the EBER 1-2 sequence (nt 127-629 of WT TMER  
412 sequence in  $\gamma$ HV68. $\beta$ 1a; nt 6629-7130 of EBV Genbank AJ507799.2). Recombinants were  
413 confirmed by restriction digestion of BAC DNA and PCR products from the left end of the  
414  $\gamma$ HV68 genome, as well as sequencing of the left end of the  $\gamma$ HV68 genome using the primers  
415 listed in Table 2.

416 Infectious virus was generated from confirmed BACs by transfecting BAC DNA into  
417 HEK 293 cells. Resulting virus was passaged through cre-recombinase expressing Vero cells to  
418 remove the loxP-flanked BAC origin of replication (48). Removal of the BAC origin of  
419 replication from the viral DNA was confirmed by PCR analysis (not shown).

420 **Infections.** To ensure an accurate count, and multiplicity of infection, all infections were  
421 done using fresh cell counts, determined by removing one well of cells with 0.05% Trypsin-  
422 EDTA (Life Tech, Cat. No. 25300-054), mixing with Trypan Blue dye (Bio-Rad, Cat. No. 145-  
423 0021), and counting live cells with the TC20 Automated Cell Counter (Bio-Rad). Virus stock  
424 titers were previously quantified with at least three plaque assays. The appropriate amount of  
425 viral stock was mixed with 5% FBS DMEM to make 100  $\mu$ L (12-well format) or 250 to 300  $\mu$ L  
426 (6-well format) of viral inoculum per well at a multiplicity of infection (MOI) of 5. Cells were  
427 incubated at 37°C with 5% CO<sub>2</sub> for 1 hour and rocked every 15 min before viral inoculum was  
428 removed. Cells were rinsed with PBS and covered with 2 mL of complete 5% DMEM. Samples  
429 were harvested at the indicated hours post-infection (hpi).

430 **5'-end characterization of small RNAs.** Characterization of the 5' ends of RNAs was  
431 performed as previously described (29); however, we analyzed all RNA species under 300

## $\gamma$ HV ncRNAs share conserved features

432 nucleotides rather than 70 nucleotides (29) - a generous cutoff to ensure inclusion of all TMER  
433 gene products. Briefly, HEK 293 cells were mock treated or infected with either WT or TMER1-  
434 only  $\gamma$ HV68. $\beta$ la at a MOI of 5. RNA was isolated from cells 24 hpi using PIG-B (49) and  
435 chloroform/isopropanol extraction, then fractionated on 15% polyacrylamide gel electrophoresis  
436 (PAGE)-urea gel. All RNA species smaller than 300 nucleotides were excised in roughly 5 mm<sup>2</sup>  
437 sections and dissolved in 1M NaCl at 4°C for approximately 48 hours. Gel pieces were removed  
438 from RNA samples with a 100  $\mu$ M strainer (Fisher, Cat. No. 22363549), then RNA was  
439 concentrated with Sartorius Vivaspin 15R columns (Sartorius, Cat. No. VS15RH92) and  
440 precipitated with isopropanol and 0.5M final concentration of ammonium acetate. Isolated small  
441 RNAs (4 to 5  $\mu$ g) were incubated with 1  $\mu$ L (for 4  $\mu$ g RNA), 1.5  $\mu$ L (for 4.5  $\mu$ g), or 2  $\mu$ L (for 5  
442  $\mu$ g RNA) of RNA 5'-Polyphosphatase (Epicentre, Cat. No. RP8092H; 20 units/ $\mu$ L) or no enzyme  
443 in a 20  $\mu$ L reaction for 1 hour at 37°C. RNA was then precipitated and remaining small RNAs  
444 (up to 1  $\mu$ g) were incubated with 1  $\mu$ L Terminator™ 5'-Phosphate-Dependent Exonuclease  
445 (Epicentre, Cat. No. TER51020; 1 unit/ $\mu$ L) or no enzyme in a 20  $\mu$ L reaction for 3 hours at 30°C.  
446 Each RNA 5'-Polyphosphatase and Terminator™ reaction included 1.5 or 0.5  $\mu$ L RNase  
447 inhibitor (NEB, Cat. No. M0307L; 40 units/ $\mu$ L), respectively. Resulting RNA samples were  
448 analyzed by northern blot.

449 **Northern Blot.** Northern blots were performed as previously described (8, 50). Enzyme-treated  
450 RNA samples were run on a 12% denaturing PAGE-urea gel, transferred to Zeta-Probe® GT  
451 Blotting Membrane (Biorad, Cat. No. 1620196), and detected with the indicated RNA  
452 oligonucleotide probes and conditions (Table 1). Relative density of each band on the blotting  
453 membrane was determined by normalizing to ethidium bromide-stained 5S rRNA in the PAGE-

## $\gamma$ HV ncRNAs share conserved features

454 urea gel using ImageJ software (51). Band density was calculated as a fold change of the related  
455 untreated RNA population, which was set to 1.

456 **Transfecting and Infecting Cells.** For transfections, HEK 293 cells were cultured in 5% FBS  
457 DMEM without penicillin or streptomycin for approximately 24 hours. Cells were plated in 2  
458 mL at  $2 \times 10^5$  cells per mL in 6-well plates. Transfection solution for each well contained Opti-  
459 MEM (Thermo Fisher Scientific) and 2  $\mu$ g of pEFBos FLAG-RIG-I (Gale Lab), pCMV2-human  
460 FLAG-La (Maraia lab), or pcDNA5 FRT/TO FLAG-HA GFP (Gack lab). Solutions for  
461 experiments using plasmid-expressed EBERs included 2  $\mu$ g of pSP73-EBERs plasmid (Steiz lab)  
462 for a total of 4  $\mu$ g of plasmid DNA. After plasmids were added to the Opti-MEM for a total  
463 volume of 200  $\mu$ L, solutions were incubated with 4:1 X-tremeGENE HP DNA Transfection  
464 Reagent (Sigma-Aldrich) for at least 15 min at room temperature. Transfection solution was  
465 added drop-wise to cells, then cells were incubated at 37°C in 5% CO<sub>2</sub> overnight. HEK 293 cells  
466 were infected 24 hours post-transfection at an MOI of 5 as previously described.

467 **Immunoprecipitation.** Cell lysates were harvested 24 hpi by scraping and pelleting cells and  
468 supernatants at 500xg for 10 min. 6 wells were pooled into one 15 mL conical tube for each  
469 sample. Cell pellets were rinsed in cold PBS following removal of supernatant, transferred to 2  
470 mL screwcap tubes, then pelleted again as before. PBS was removed from the cell pellet and  
471 cells were resuspended in 500  $\mu$ L of lysis buffer. Lysis buffer contained 50 mM Tris pH 7.4, 150  
472 mM NaCl, 1% NP-40, dithiothreitol (DTT), sodium fluoride (NaF), and protease inhibitors  
473 (aprotinin, leupeptin, and phenylmethylsulfonyl fluoride [PMSF]). Following incubation with  
474 lysis buffer, cell lysates were cleared by centrifugation at 10,000xg for 20 min at 4°C and  
475 transferred to new 2 mL screw cap tubes. Protein concentrations of cell lysates were determined  
476 using the Pierce BCA Protein Assay kit (Thermo Fisher Scientific, Cat. No. 23227).

## $\gamma$ HV ncRNAs share conserved features

477           350  $\mu$ g of cell lysates were incubated at 4°C overnight on a rotator with anti-FLAG M2  
478 magnetic beads (Sigma, Cat. No. M8823) and TBS (50 mM Tris pH 7.4, 150 mM NaCl). In  
479 permissive wash conditions, beads were washed three times with cold TBS (Fig 3, Fig S3). In  
480 stringent wash conditions, beads were washed three times with cold lysis buffer (with DTT, NaF,  
481 and protease inhibitors), then two times with cold high-salt lysis buffer (50mM Tris-HCl pH 7.4,  
482 300mM NaCl, 1% NP-40, DTT, NaF, protease inhibitors). Following removal of wash buffer,  
483 beads were resuspended in 60  $\mu$ L of storage buffer (50mM Tris pH 7.4, 150mM NaCl, 50%  
484 glycerol, 0.02% Na Azide) and 10% of the volume was transferred to a new tube for western blot  
485 analysis of proteins. The remaining volume was used for RNA isolation.

486 **Western Blot.** Total cell lysate (35  $\mu$ g) or immunoprecipitation beads were incubated with 4x  
487 Laemmli buffer (52) at 95°C for 5 min, then loaded into a 10% or 12% SDS-PAGE gel with  
488 Precision Plus Protein Dual Color Standard (Biorad, Cat. No. 1610374). Following adequate  
489 separation of bands, proteins were semidry transferred to Immobilon®-P PVDF membrane  
490 (MilliporeSigma, Cat. No. IPVH00010) for 1 h to 1 h 15 min at 10 Volts (Thermo Fisher  
491 Scientific, Owl™ HEP-1). Membrane was probed with 1:2000 M2 monoclonal mouse anti-  
492 FLAG (Sigma, Cat. No. F1804-50ug). Proteins were detected with horseradish peroxidase  
493 (HRP)-conjugated donkey anti-mouse secondary antibody (Jackson ImmunoResearch, Cat. No.  
494 715-035-150) and Amersham™ ECL™ Prime Western Blotting Detection Reagent (Cytiva, Cat.  
495 No. RPN2232).

### 496 **RNA analysis**

497           **Isolation.** RNA was isolated from immunoprecipitation complexes or cells with TRIzol®  
498 Reagent (Thermo Fisher Scientific, Cat. No. 15596026), then DNase-treated with TURBO™  
499 DNase (Invitrogen, Cat. No. AM2238) following the manufacturer's protocols.

## $\gamma$ HV ncRNAs share conserved features

500           **Reverse transcription PCR amplification.** Primers used for RT-PCR are listed in Table

501 3. RNA transcripts of interest were detected using the OneStep RT-PCR Kit (Qiagen, Cat. No.  
502 210212), with the following conditions: (i) 50°C for 30 m, (ii) 95°C for 15 m, (iii) 40 cycles of  
503 94°C for 30 s, anneal for 30 s, and 72°C for 30 s, (iv) 72°C for 10 m, (v) hold at 4°C. The  
504 annealing temperature was adjusted depending on the target: M3 = 50°C, TMER1 = 50.5°C or  
505 52°C (for Fig 3 and Fig 5, respectively), TMER4 = 50°C, TMER5 = 50°C, TMER8 = 56°C,  
506 EBER1 = 52°C, EBER2 = 56°C. For semi-quantitative analysis, step (iii) was limited to 30  
507 cycles (TMER1, EBER1, EBER2) or 33 cycles (TMER4).

508           **PCR analysis.** PCR amplification was performed using Taq DNA polymerase (Qiagen,  
509 Cat. No. 201205) with the following conditions: (i) 95°C for 5 min, (ii) 30-40 cycles of 94°C for  
510 30 s, anneal for 30 s, 72°C for 30 s, (iii) 72°C for 10 min, (iv) hold at 4°C. When checking RNA  
511 for DNA contamination, the same primers as the RT-PCR reaction were used, and step (iii)  
512 annealing temperature and cycle numbers were adjusted for consistency with the related RT-PCR  
513 reaction. For DNA targets, primers are listed in Table 3 and the annealing temperature was  
514 adjusted depending on the target: M3 = 50°C, TMER4 = 50°C, TMER5 = 53°C, TMER8 =  
515 60°C, EBER1 = 52°C, EBER2 = 56°C.

516           **Reverse transcription quantitative PCR.** RNA samples shown to be DNA-free by PCR  
517 were converted to cDNA using SuperScript III Reverse Transcriptase (Invitrogen, Cat. No.  
518 18080093) following the manufacturer's protocol. 20 nanograms (ng) of the cDNA was then  
519 used for qPCR analysis of the  $\gamma$ HV68 TMER1 (31) or EBV EBER1 genes using iQ<sup>TM</sup> SYBR®  
520 Green Supermix (Bio-Rad, Cat. No. 1708880) with the following conditions: i) 95°C for 3 min,  
521 ii) 40 cycles of 95°C for 15 s, 60°C for 1 min, iii) 95°C for 15 s, 60°C for 1 min, 95°C for 15 s.  
522 Primers used for qPCR analysis are listed in Table 3.

## $\gamma$ HV ncRNAs share conserved features

523           **RT-qPCR analysis:** Viral ncRNAs were detected by qPCR from whole cell lysates  
524 (“total”) and immunoprecipitated (“IP”) proteins (GFP, RIG-I, or La) in both mock and infected  
525 (WT or EBER-KI  $\gamma$ HV68. $\beta$ la) conditions. The Ct value for each IP sample was subtracted from  
526 the Ct value for the matched total sample; ( $Ct_{protein\ total} - Ct_{protein\ IP}$ ). This value was then  
527 normalized to the GFP control by subtracting from the matched GFP condition for the “delta Ct”  
528 ( $\Delta Ct$ ). For RIG-I samples:  $\Delta Ct = (Ct_{RIG-I\ total} - Ct_{RIG-I\ IP}) - (Ct_{GFP\ total} - Ct_{GFP\ IP})$ . For La  
529 samples:  $\Delta Ct = (Ct_{La\ total} - Ct_{La\ IP}) - (Ct_{GFP\ total} - Ct_{GFP\ IP})$ . Fold enrichment for each  
530 target was calculated as  $2^{\Delta Ct}$ .

531           **Single-step replication analysis.** 3T12 fibroblasts cells were infected in triplicate with each  
532 viral recombinant at an MOI of 5 for single-step replication analysis as previously described  
533 (53). Cells were inoculated with virus for 1 h at 37°C in 5% CO<sub>2</sub>, rinsed with PBS, then  
534 incubated in 5% cDMEM. One set of samples (cells and supernatant) was collected immediately  
535 following inoculation (0 hpi). Remaining samples were collected at 1, 6, 12, 24, and 48 hpi, then  
536 subjected to three freeze-thaw cycles before plaque assay quantitation (33).

### 537 *In vivo* infections

538           **Mice.** BALB/c interferon-gamma deficient mice (IFN $\gamma^{-/-}$ ) were originally obtained from  
539 the Jackson Laboratory [strain C.129S7(B6)-Ifngtm1Ts/J, stock no. 002286]. Mice were bred in-  
540 house at the University of Colorado Denver Anschutz Medical Campus following university  
541 regulations and infected mice were housed in an animal biosafety level 2 facility in accordance  
542 with all university regulations.

543           **Virus infection of mice.** Mice were anesthetized with isoflurane (McKesson, Cat. No.  
544 803250) and intranasally inoculated with  $4 \times 10^5$  PFU/mouse of WT  $\gamma$ HV68. $\beta$ la or the indicated  
545 viral recombinants in a 40- $\mu$ l total volume of 5% cDMEM as previously described (7). Mice



## $\gamma$ HV ncRNAs share conserved features

546 were monitored daily for signs of disease. Any mice that appeared moribund were sacrificed, and  
547 their lungs were removed for viral titer analysis.

548 ***Ex vivo* viral titer analysis.** Infected tissues were collected at the indicated time post-  
549 infection and frozen at  $-80^{\circ}\text{C}$ . The right post-caval lobe of the lung was separated for qPCR and  
550 plaque assay analysis. DNA was isolated from a portion of the lung tissue using the Qiagen  
551 DNeasy® Blood & Tissue Kit (Cat. No. 69506) with a modified overnight proteinase K  
552 incubation followed by heat inactivation ( $95^{\circ}\text{C}$  for 10 min). Isolated DNA was subsequently  
553 analyzed by qPCR for a viral gene (gB). Virus titer was quantified in the remaining lung tissue  
554 by homogenizing tissue in 1 mL of 5% cDMEM and 1.0-mm silica beads (BioSpec Products Inc,  
555 Cat. No. 11079110z) via MagNA Lyser (Roche). Homogenized tissue was subjected to three  
556 freeze-thaw cycles prior to plaque assay quantification of viral titer (53).

557 **Quantitative reverse-transcription PCR for viral genome.** The number of viral genome  
558 copies in DNA samples was quantified by qPCR for the viral gene gB. Lung DNA was  
559 normalized to a concentration of 20 ng/ $\mu\text{L}$  for qPCR analysis of 100 ng of DNA using a  
560 LightCycler 480 probe kit (Roche, Cat. No. 04707494001) with the gB primers and probe listed  
561 in Table 3 (54, 55). A gB standard curve was generated using a gB plasmid dilution series  
562 ranging from  $10^2$  copies to  $10^{10}$  diluted in background DNA, with a limit of detection (LOD) of  
563 100 copies (56). Each sample was run as a technical triplicate.

564 **Plaque Assay.** Plaque assay quantification of viral titer was performed as previously described  
565 (53, 57) with the following modifications. 3T12 fibroblasts were plated in 12-well plates at  
566  $8.5 \times 10^4$  cells per well the day prior to infection. Viral samples were diluted 10-fold in 5%  
567 cDMEM, then 100  $\mu\text{L}$  of inoculum was added to each well. An internal standard was included  
568 for each infection to ensure reproducible sensitivity for each plaque assay. Cells were incubated

## γHV ncRNAs share conserved features

569 with virus for 1 h at 37°C at 5% CO<sub>2</sub> and plates were rocked every 15 min. Cells were then  
570 overlaid in a 1:1 mix of 10% cDMEM and carboxymethyl cellulose (CMC; Sigma, Cat. No. C-  
571 4888) supplemented with Gibco™ Amphotericin B (Thermo Fisher Scientific, Cat. No.  
572 15290018). 8 days post infection, the overlay was removed and cells were rinsed with PBS. Cells  
573 were then stained with 0.5% methylene blue in 70% methanol and plaques were counted to  
574 calculate viral titer.

575 **Software and Statistical Analysis.** Analysis of northern blot images and band densities were  
576 performed using ImageJ software (51). Plotting and data analysis were performed using  
577 GraphPad Prism (version 9.3.1; GraphPad Software, San Diego, California USA,  
578 [www.graphpad.com](http://www.graphpad.com)). Statistical significance was tested by one-way or two-way analysis of  
579 variance (ANOVA) for comparing three or more conditions or comparing grouped data,  
580 respectively.

581 **Ethics Statement.** All animal studies were performed in accordance with the recommendations  
582 in the Guide for the Care and Use of Laboratory Animals of the National Institutes of Health.  
583 Studies were conducted in accordance with the University of Colorado Denver Institutional  
584 Animal Use and Care Committee under the Animal Welfare Assurance of Compliance policy  
585 (no. D16-00171). All procedures were performed under isoflurane anesthesia, and all efforts  
586 were made to minimize suffering.

## 587 **ACKNOWLEDGEMENTS**

588 This research was funded by NIH R21AI134084, R01AI121300, R01AI157201 and the  
589 Molecular Pathogenesis of Infectious Disease Training Grant 5T32AI052066.

590 We thank the members of the van Dyk and Clambey lab for helpful discussions and  
591 members of the Colorado RNA Bioscience Initiative for their insights. Special thanks go to Dr.

## $\gamma$ HV ncRNAs share conserved features

592 Neelanjan Mukherjee for expert advice on IP experiments. We thank the following labs for their  
593 generous plasmid gifts: Dr. Michael Gale (pEFBos FLAG-RIG-I), Dr. Rich Maraia (pCMV2-  
594 human FLAG-La), Dr. Joan Steitz (pSP73-EBERs), and Dr. Michaela Gack (pcDNA5 FRT/TO  
595 FLAG-HA GFP).

## 596 **REFERENCES**

- 597 1. Longnecker R, Kieff E, Cohen JI. 2013. Epstein-Barr Virus, Fields Virology, 6th ed.  
598 Wolters Kluwer Health Adis (ESP).
- 599 2. Ganem D. 2006. KSHV infection and the pathogenesis of Kaposi's sarcoma. *Annu Rev*  
600 *Pathol* 1:273-96.
- 601 3. Blaskovic D, Stancekova M, Svobodova J, Mistrikova J. 1980. Isolation of five strains of  
602 herpesviruses from two species of free living small rodents. *Acta Virol* 24:468.
- 603 4. Barton E, Mandal P, Speck SH. 2011. Pathogenesis and host control of  
604 gammaherpesviruses: lessons from the mouse. *Annu Rev Immunol* 29:351-97.
- 605 5. Cesarman E. 2011. Gammaherpesvirus and lymphoproliferative disorders in  
606 immunocompromised patients. *Cancer Lett* 305:163-74.
- 607 6. Oko LM, Kimball AK, Kaspar RE, Knox AN, Coleman CB, Rochford R, Chang T,  
608 Alderete B, van Dyk LF, Clambey ET. 2019. Multidimensional analysis of  
609 Gammaherpesvirus RNA expression reveals unexpected heterogeneity of gene  
610 expression. *PLoS Pathog* 15:e1007849.
- 611 7. Diebel KW, Oko LM, Medina EM, Niemeyer BF, Warren CJ, Claypool DJ, Tibbetts SA,  
612 Cool CD, Clambey ET, van Dyk LF. 2015. Gammaherpesvirus small noncoding RNAs  
613 are bifunctional elements that regulate infection and contribute to virulence in vivo.  
614 *MBio* 6:e01670-14.

## $\gamma$ HV ncRNAs share conserved features

- 615 8. Diebel KW, Smith AL, van Dyk LF. 2010. Mature and functional viral miRNAs  
616 transcribed from novel RNA polymerase III promoters. *RNA* 16:170-85.
- 617 9. Iwakiri D. 2016. Multifunctional non-coding Epstein-Barr virus encoded RNAs (EBERs)  
618 contribute to viral pathogenesis. *Virus Res* 212:30-8.
- 619 10. Iwakiri D, Zhou L, Samanta M, Matsumoto M, Ebihara T, Seya T, Imai S, Fujieda M,  
620 Kawa K, Takada K. 2009. Epstein-Barr virus (EBV)-encoded small RNA is released  
621 from EBV-infected cells and activates signaling from Toll-like receptor 3. *J Exp Med*  
622 206:2091-9.
- 623 11. Li Z, Duan Y, Cheng S, Chen Y, Hu Y, Zhang L, He J, Liao Q, Yang L, Sun LQ. 2015.  
624 EBV-encoded RNA via TLR3 induces inflammation in nasopharyngeal carcinoma.  
625 *Oncotarget* 6:24291-303.
- 626 12. Samanta M, Iwakiri D, Kanda T, Imaizumi T, Takada K. 2006. EB virus-encoded RNAs  
627 are recognized by RIG-I and activate signaling to induce type I IFN. *EMBO J* 25:4207-  
628 14.
- 629 13. Samanta M, Iwakiri D, Takada K. 2008. Epstein-Barr virus-encoded small RNA induces  
630 IL-10 through RIG-I-mediated IRF-3 signaling. *Oncogene* 27:4150-60.
- 631 14. Chiu YH, Macmillan JB, Chen ZJ. 2009. RNA polymerase III detects cytosolic DNA and  
632 induces type I interferons through the RIG-I pathway. *Cell* 138:576-91.
- 633 15. Gunnery S, Mathews MB. 1995. Functional mRNA can be generated by RNA  
634 polymerase III. *Mol Cell Biol* 15:3597-607.
- 635 16. Stefano JE. 1984. Purified lupus antigen La recognizes an oligouridylate stretch common  
636 to the 3' termini of RNA polymerase III transcripts. *Cell* 36:145-54.

## $\gamma$ HV ncRNAs share conserved features

- 637 17. Mathews MB, Francoeur AM. 1984. La antigen recognizes and binds to the 3'-  
638 oligouridylate tail of a small RNA. *Mol Cell Biol* 4:1134-40.
- 639 18. Rosa MD, Gottlieb E, Lerner MR, Steitz JA. 1981. Striking similarities are exhibited by  
640 two small Epstein-Barr virus-encoded ribonucleic acids and the adenovirus-associated  
641 ribonucleic acids VAI and VAII. *Mol Cell Biol* 1:785-96.
- 642 19. Yoneyama M, Kikuchi M, Natsukawa T, Shinobu N, Imaizumi T, Miyagishi M, Taira K,  
643 Akira S, Fujita T. 2004. The RNA helicase RIG-I has an essential function in double-  
644 stranded RNA-induced innate antiviral responses. *Nat Immunol* 5:730-7.
- 645 20. Hornung V, Ellegast J, Kim S, Brzozka K, Jung A, Kato H, Poeck H, Akira S,  
646 Conzelmann KK, Schlee M, Endres S, Hartmann G. 2006. 5'-Triphosphate RNA is the  
647 ligand for RIG-I. *Science* 314:994-7.
- 648 21. Lerner MR, Andrews NC, Miller G, Steitz JA. 1981. Two small RNAs encoded by  
649 Epstein-Barr virus and complexed with protein are precipitated by antibodies from  
650 patients with systemic lupus erythematosus. *Proc Natl Acad Sci U S A* 78:805-9.
- 651 22. Cheng S, Li Z, He J, Fu S, Duan Y, Zhou Q, Yan Y, Liu X, Liu L, Feng C, Zhang L, He  
652 J, Deng Y, Sun LQ. 2019. Epstein-Barr virus noncoding RNAs from the extracellular  
653 vesicles of nasopharyngeal carcinoma (NPC) cells promote angiogenesis via TLR3/RIG-  
654 I-mediated VCAM-1 expression. *Biochim Biophys Acta Mol Basis Dis* 1865:1201-1213.
- 655 23. Diebel KW, Claypool DJ, van Dyk LF. 2014. A conserved RNA polymerase III promoter  
656 required for gammaherpesvirus TMER transcription and microRNA processing. *Gene*  
657 544:8-18.

## $\gamma$ HV ncRNAs share conserved features

- 658 24. Bowden RJ, Simas JP, Davis AJ, Efstathiou S. 1997. Murine gammaherpesvirus 68  
659 encodes tRNA-like sequences which are expressed during latency. *J Gen Virol* 78 ( Pt  
660 7):1675-87.
- 661 25. Zhu JY, Strehle M, Frohn A, Kremmer E, Hofig KP, Meister G, Adler H. 2010.  
662 Identification and analysis of expression of novel microRNAs of murine  
663 gammaherpesvirus 68. *J Virol* 84:10266-75.
- 664 26. Reese TA, Xia J, Johnson LS, Zhou X, Zhang W, Virgin HW. 2010. Identification of  
665 novel microRNA-like molecules generated from herpesvirus and host tRNA transcripts. *J*  
666 *Virol* 84:10344-53.
- 667 27. Bullard WL, Kara M, Gay LA, Sethuraman S, Wang Y, Nirmalan S, Esemeli A,  
668 Feswick A, Hoffman BA, Renne R, Tibbetts SA. 2019. Identification of murine  
669 gammaherpesvirus 68 miRNA-mRNA hybrids reveals miRNA target conservation  
670 among gammaherpesviruses including host translation and protein modification  
671 machinery. *PLoS Pathog* 15:e1007843.
- 672 28. Orioli A, Pascali C, Quartararo J, Diebel KW, Praz V, Romascano D, Percudani R, van  
673 Dyk LF, Hernandez N, Teichmann M, Dieci G. 2011. Widespread occurrence of non-  
674 canonical transcription termination by human RNA polymerase III. *Nucleic Acids Res*  
675 39:5499-512.
- 676 29. Burke JM, Bass CR, Kincaid RP, Sullivan CS. 2014. Identification of tri-phosphatase  
677 activity in the biogenesis of retroviral microRNAs and RNAP III-generated shRNAs.  
678 *Nucleic Acids Res* 42:13949-62.
- 679 30. Gopalan V, Jarrous N, Krasilnikov AS. 2018. Chance and necessity in the evolution of  
680 RNase P. *RNA* 24:1-5.

## $\gamma$ HV ncRNAs share conserved features

- 681 31. Knox AN, Mueller A, Medina EM, Clambey ET, van Dyk LF. 2021. Lytic Infection with  
682 Murine Gammaherpesvirus 68 Activates Host and Viral RNA Polymerase III Promoters  
683 and Enhances Noncoding RNA Expression. *J Virol* 95:e0007921.
- 684 32. Chiang JJ, Sparrer KMJ, van Gent M, Lassig C, Huang T, Osterrieder N, Hopfner KP,  
685 Gack MU. 2018. Viral unmasking of cellular 5S rRNA pseudogene transcripts induces  
686 RIG-I-mediated immunity. *Nat Immunol* 19:53-62.
- 687 33. Lee KS, Cool CD, van Dyk LF. 2009. Murine gammaherpesvirus 68 infection of gamma  
688 interferon-deficient mice on a BALB/c background results in acute lethal pneumonia that  
689 is dependent on specific viral genes. *J Virol* 83:11397-401.
- 690 34. Clambey ET, Virgin HWt, Speck SH. 2002. Characterization of a spontaneous 9.5-  
691 kilobase-deletion mutant of murine gammaherpesvirus 68 reveals tissue-specific genetic  
692 requirements for latency. *J Virol* 76:6532-44.
- 693 35. Feldman ER, Kara M, Oko LM, Grau KR, Krueger BJ, Zhang J, Feng P, van Dyk LF,  
694 Renne R, Tibbetts SA. 2016. A Gammaherpesvirus Noncoding RNA Is Essential for  
695 Hematogenous Dissemination and Establishment of Peripheral Latency. *mSphere* 1.
- 696 36. Lee N, Moss WN, Yario TA, Steitz JA. 2015. EBV noncoding RNA binds nascent RNA  
697 to drive host PAX5 to viral DNA. *Cell* 160:607-618.
- 698 37. Lee N, Pimienta G, Steitz JA. 2012. AUF1/hnRNP D is a novel protein partner of the  
699 EBER1 noncoding RNA of Epstein-Barr virus. *RNA* 18:2073-82.
- 700 38. Fok V, Mitton-Fry RM, Grech A, Steitz JA. 2006. Multiple domains of EBER 1, an  
701 Epstein-Barr virus noncoding RNA, recruit human ribosomal protein L22. *RNA* 12:872-  
702 82.

## $\gamma$ HV ncRNAs share conserved features

- 703 39. Pfeffer S, Sewer A, Lagos-Quintana M, Sheridan R, Sander C, Grasser FA, van Dyk LF,  
704 Ho CK, Shuman S, Chien M, Russo JJ, Ju J, Randall G, Lindenbach BD, Rice CM,  
705 Simon V, Ho DD, Zavolan M, Tuschl T. 2005. Identification of microRNAs of the  
706 herpesvirus family. *Nat Methods* 2:269-76.
- 707 40. Hoffman BA, Wang Y, Feldman ER, Tibbetts SA. 2019. Epstein-Barr virus EBER1 and  
708 murine gammaherpesvirus TMER4 share conserved in vivo function to promote B cell  
709 egress and dissemination. *Proc Natl Acad Sci U S A* 116:25392-25394.
- 710 41. Feldman ER, Kara M, Coleman CB, Grau KR, Oko LM, Krueger BJ, Renne R, van Dyk  
711 LF, Tibbetts SA. 2014. Virus-encoded microRNAs facilitate gammaherpesvirus latency  
712 and pathogenesis in vivo. *MBio* 5:e00981-14.
- 713 42. Steer B, Strehle M, Sattler C, Bund D, Flach B, Stoeger T, Haas JG, Adler H. 2016. The  
714 small noncoding RNAs (sncRNAs) of murine gammaherpesvirus 68 (MHV-68) are  
715 involved in regulating the latent-to-lytic switch in vivo. *Sci Rep* 6:32128.
- 716 43. Tucker JM, Schaller AM, Willis I, Glaunsinger BA. 2020. Alteration of the Premature  
717 tRNA Landscape by Gammaherpesvirus Infection. *mBio* 11.
- 718 44. Virgin HWt, Latreille P, Wamsley P, Hallsworth K, Weck KE, Dal Canto AJ, Speck SH.  
719 1997. Complete sequence and genomic analysis of murine gammaherpesvirus 68. *J Virol*  
720 71:5894-904.
- 721 45. Adler H, Messerle M, Wagner M, Koszinowski UH. 2000. Cloning and mutagenesis of  
722 the murine gammaherpesvirus 68 genome as an infectious bacterial artificial  
723 chromosome. *J Virol* 74:6964-74.



## $\gamma$ HV ncRNAs share conserved features

- 724 46. Nealy MS, Coleman CB, Li H, Tibbetts SA. 2010. Use of a virus-encoded enzymatic  
725 marker reveals that a stable fraction of memory B cells expresses latency-associated  
726 nuclear antigen throughout chronic gammaherpesvirus infection. *J Virol* 84:7523-34.
- 727 47. Tischer BK, Smith GA, Osterrieder N. 2010. En passant mutagenesis: a two step  
728 markerless red recombination system. *Methods Mol Biol* 634:421-30.
- 729 48. Lee KS, Suarez AL, Claypool DJ, Armstrong TK, Buckingham EM, van Dyk LF. 2012.  
730 Viral cyclins mediate separate phases of infection by integrating functions of distinct  
731 mammalian cyclins. *PLoS Pathog* 8:e1002496.
- 732 49. Weber K, Bolander ME, Sarkar G. 1998. PIG-B: a homemade monophasic cocktail for  
733 the extraction of RNA. *Mol Biotechnol* 9:73-7.
- 734 50. McClure LV, Lin YT, Sullivan CS. 2011. Detection of viral microRNAs by Northern blot  
735 analysis. *Methods Mol Biol* 721:153-71.
- 736 51. Schneider CA, Rasband WS, Eliceiri KW. 2012. NIH Image to ImageJ: 25 years of  
737 image analysis. *Nat Methods* 9:671-5.
- 738 52. Laemmli UK. 1970. Cleavage of structural proteins during the assembly of the head of  
739 bacteriophage T4. *Nature* 227:680-5.
- 740 53. van Dyk LF, Virgin HWt, Speck SH. 2000. The murine gammaherpesvirus 68 v-cyclin is  
741 a critical regulator of reactivation from latency. *J Virol* 74:7451-61.
- 742 54. Michaud F, Coulombe F, Gaudreault E, Kriz J, Gosselin J. 2010. Involvement of TLR2 in  
743 recognition of acute gammaherpesvirus-68 infection. *PLoS One* 5:e13742.
- 744 55. Nguyen Y, McGuffie BA, Anderson VE, Weinberg JB. 2008. Gammaherpesvirus  
745 modulation of mouse adenovirus type 1 pathogenesis. *Virology* 380:182-90.

## $\gamma$ HV ncRNAs share conserved features

- 746 56. Coomes SM, Farmen S, Wilke CA, Laouar Y, Moore BB. 2011. Severe  
747 gammaherpesvirus-induced pneumonitis and fibrosis in syngeneic bone marrow  
748 transplant mice is related to effects of transforming growth factor-beta. *Am J Pathol*  
749 179:2382-96.
- 750 57. Clambey ET, Virgin HWt, Speck SH. 2000. Disruption of the murine gammaherpesvirus  
751 68 M1 open reading frame leads to enhanced reactivation from latency. *J Virol* 74:1973-  
752 84.
- 753  
754

$\gamma$ HV ncRNAs share conserved features

755 **Table 1. Probes and conditions for northern blot analyses.**

| Target    | Probe                         | Sequence                                              | Hyb. Temp. (°C) | Wash Temp (°C) |
|-----------|-------------------------------|-------------------------------------------------------|-----------------|----------------|
| Host tRNA | Host tRNA (Valine)            | 5'—CUA AGU GUA AGU UGG GUG CUU UGU GUU AAG CUA CAC—3' | 38.5            | 30.8           |
| 5S rRNA   | 5S rRNA                       | 5'—CCC UGC UUA GCU UCC GAG AUC AGA C—3'               | 38.5            | 38.5           |
| TMER1     | miR-M1-1 (Probe 1)            | 5'—AAA GGA AGU ACG GCC AUU UCU A—3'                   | 48.0            | 38.0           |
| TMER1     | pol III-I Hard Stop (Probe 2) | 5'—AAA GUU GGA CCC ACU UCC—3'                         | 46.6            | 36.6           |
| TMER1     | tRNA-like pol III-1 (Probe 3) | 5'—GAA CCA CCA GGA UCG GUG ACC U—3'                   | 45.0            | 35.0           |
| TMER4     | TMER 4 Probe                  | 5'—AGA CGA CCC GAU CUC AAC UCU—3'                     | 37.0            | 37.0           |
| TMER5     | miR-M1-7-3                    | 5'—AAU AAA GGU GGG CGC GAU AUC—3'                     | 55.0            | 37.5           |

756

757 **Table 2. Primers used for recombinant gBLOCK assembly and sequencing of  $\gamma$ HV68**

758 **recombinants.**

| Name            | Sequence                              | Purpose                                                           |
|-----------------|---------------------------------------|-------------------------------------------------------------------|
| TMER4_For       | 5'—AGC TCT AAA GCT CTG GTC TGC T—3'   | PCR-amplification of Gibson-assembled gBLOCKS                     |
| TMER4_Rev       | 5'—TCG GGT TTG CCT CCT TC—3'          |                                                                   |
| TMER5_For       | 5'—CGC CAA AGT CTA AGT CCC TGT AC—3'  |                                                                   |
| TMER5_Rev       | 5'—TTA GGA GGT TAC CGC ACC TC—3'      |                                                                   |
| TMER8_For       | 5'—TCT TGA GGA GCT CGA GTC TTC—3'     |                                                                   |
| TMER8_Rev       | 5'—TAA ACA CTC CGG CCA CG—3'          |                                                                   |
| EBER_For        | 5'—CAC TAT CTC TGG TTC TGC AAA GC—3'  |                                                                   |
| EBER_Rev        | 5'—TTG GGT ATG GCA AAA ACA AAA CAG—3' | Sequencing confirmation of left-end of $\gamma$ HV68 recombinants |
| TMER4-5_Seq_For | 5'—TAA CAA CTC TGA AGG AAC TGT G—3'   |                                                                   |
| TMER4-5_Seq_Rev | 5'—TAA CAA CTC TGA AGG AAC TGT G—3'   |                                                                   |
| TMER8_Seq_For   | 5'—ACG TGG TGA GAC TCT CTA GAA G—3'   |                                                                   |
| TMER8_Seq_Rev   | 5'—TGT GGT GAT CAC TAG GAA AGT G—3'   |                                                                   |

759 **Table 3: Oligonucleotides for RT-PCR, PCR, and qPCR analysis.**

| Name                                   | Genome position               | Sequence                                            | Purpose                                        |
|----------------------------------------|-------------------------------|-----------------------------------------------------|------------------------------------------------|
| M3 Forward                             | $\gamma$ HV68:<br>6626...6645 | 5'—TAC TCC TCC ACC<br>TTT ACC TG—3'                 | RT-PCR and PCR for<br>$\gamma$ HV68 M3 gene    |
| M3 Reverse                             | $\gamma$ HV68:<br>6545...6563 | 5'—CTG TTC TTA CAG<br>ACC GGG G—3'                  | RT-PCR and PCR for<br>$\gamma$ HV68 M3 gene    |
| TMER1 – Forward                        | $\gamma$ HV68:<br>127...145   | 5'—GCC AGA GTA<br>GCT CAA TTG G—3'                  | RT-PCR for $\gamma$ HV68<br>TMER1 gene         |
| TMER1 – Reverse1<br>(Figure 3, Fig S3) | $\gamma$ HV68:<br>234...254   | 5'—GGA AGT ACG<br>GCC ATT TCT ATC—3'                | RT-PCR for $\gamma$ HV68<br>TMER1 gene         |
| TMER1 – Reverse2<br>(Fig 4, 5)         | $\gamma$ HV68:<br>202...220   | 5'—AAA GTT GGA<br>CCC ACT TCC T—3'                  | RT-PCR for $\gamma$ HV68<br>TMER1 gene         |
| TMER4 – Forward                        | $\gamma$ HV68:<br>1182...1199 | 5'—GTC GGG GTA GCT<br>CAA TTG—3'                    | RT-PCR and PCR for<br>$\gamma$ HV68 TMER4 gene |
| TMER4 – Reverse                        | $\gamma$ HV68:<br>1358...1376 | 5'—CCA CCT CAC ACA<br>GTT TCA G—3'                  | RT-PCR and PCR for<br>$\gamma$ HV68 TMER4 gene |
| TMER5 – Forward<br>RT-PCR              | $\gamma$ HV68:<br>1588...1605 | 5'—GCC AGG GTA<br>GCT CAA TTG—3'                    | RT-PCR for $\gamma$ HV68<br>TMER5 gene         |
| TMER5 – Forward<br>PCR                 | $\gamma$ HV68:<br>1485...1505 | 5'—AGC CGC TTA TGT<br>ACC CAG AAG—3'                | PCR for $\gamma$ HV68<br>TMER5 gene            |
| TMER5 – Reverse<br>PCR                 | $\gamma$ HV68:<br>1770...1787 | 5'—AAG GGG TAG<br>GAC TCC CAC—3'                    | RT-PCR and PCR for<br>$\gamma$ HV68 TMER5 gene |
| TMER8 – Forward<br>RT-PCR              | $\gamma$ HV68:<br>5399...5418 | 5'—CCT GGT AGA<br>GCA CCA GGC TG—3'                 | RT-PCR for $\gamma$ HV68<br>TMER8 gene         |
| TMER8 – Forward<br>PCR                 | $\gamma$ HV68:<br>5320...5344 | 5'—CTG GCG CGC CTG<br>TAT GCA AAA CTA<br>A—3'       | PCR for $\gamma$ HV68<br>TMER8 gene            |
| TMER8 – Reverse                        | $\gamma$ HV68:<br>5498...5517 | 5'—GGA GAG ACC<br>CGG AAG GTG GG—3'                 | RT-PCR and PCR for<br>$\gamma$ HV68 TMER8 gene |
| EBER1 – Forward                        | EBV:<br>6629...6648           | 5'—AGG ACC TAC GCT<br>GCC CTA GA—3'                 | RT-PCR and PCR for<br>EBV EBER1 gene           |
| EBER1 – Reverse                        | EBV:<br>6779...6795           | 5'—AAA ACA TGC<br>GGA CCA GC—3'                     | RT-PCR and PCR for<br>EBV EBER1 gene           |
| EBER2 – Forward<br>RT-PCR              | EBV:<br>6964...6981           | 5'—GTT GTT CTC GAG<br>CGT TGC CCT AGT<br>GGT TTC—3' | RT-PCR for EBV<br>EBER2 gene                   |
| EBER2 – Forward<br>PCR                 | EBV:<br>6876...6891           | 5'—GTC GTT CTC GAG<br>AGA TGC ACG CTT<br>AAC C—3'   | PCR for EBV EBER2<br>gene                      |
| EBER2 – Reverse                        | EBV:<br>7104...7127           | 5'—AAA ACA GCG<br>GAC AAG CCG AAT<br>ACC—3'         | RT-PCR and PCR for<br>EBER2 gene               |
| MHV68_TMER1-<br>iQ_F                   | $\gamma$ HV68:<br>148...167   | 5'—GAG CAA CAG<br>GTC ACC GAT CC—3'                 | SYBR Green qPCR for<br>$\gamma$ HV68 TMER1     |

$\gamma$ HV ncrNAs share conserved features

|                   |                                 |                                                |                                            |
|-------------------|---------------------------------|------------------------------------------------|--------------------------------------------|
| MHV68_TMER1-iQ_R  | $\gamma$ HV68:<br>273...293     | 5'—TGC AGA CAA<br>GTG ATT GCA CTG—3'           | SYBR Green qPCR for<br>$\gamma$ HV68 TMER1 |
| iQ-EBER1_F        | EBV:<br>6636...6655             | 5'—ACG CTG CCC TAG<br>AGG TTT TG—3'            | SYBR Green qPCR for<br>EBV EBER1           |
| iQ-EBER1_R        | EBV:<br>6777...6795             | 5'—AAA ACA TGC<br>GGA CCA CCA G—3'             | SYBR Green qPCR for<br>EBV EBER1           |
| gB Forward Primer | $\gamma$ HV68:<br>17873...17892 | 5'—GGC CCA AAT TCA<br>ATT TGC CT—3'            | TaqMan qPCR for<br>$\gamma$ HV68 genome    |
| gB Reverse Primer | $\gamma$ HV68:<br>17924...17943 | 5'—CCC TGG ACA ACT<br>CCT CAA GC—3'            | Taqman qPCR for<br>$\gamma$ HV68 genome    |
| gB Probe          | $\gamma$ HV68:<br>17896...17921 | 5'—ACA AGC TGA<br>CCA CCA GCG TCA<br>ACA AC—3' | Taqman qPCR for<br>$\gamma$ HV68 genome    |

760 <sup>a</sup> $\gamma$ HV68 genome coordinates refer to NC\_001826 and EBV genome coordinates refer to  
761 GenBank: AJ507799.2  
762

$\gamma$ HV ncRNAs share conserved features

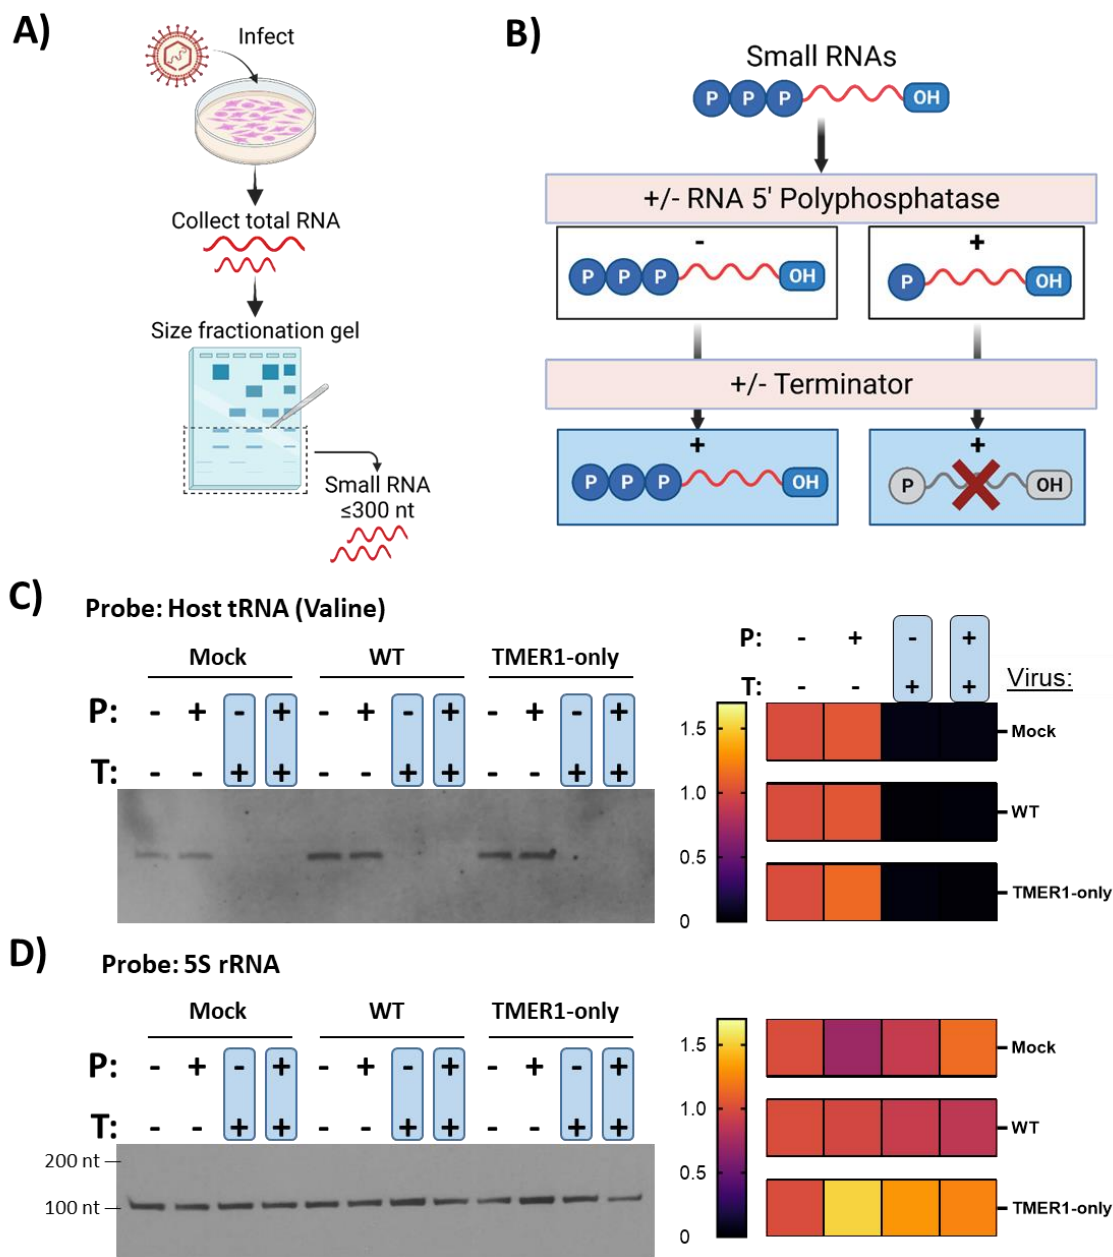

## $\gamma$ HV ncRNAs share conserved features

769 characterization of RNA. Small RNAs are treated with or without RNA 5'-polyphosphatase to  
770 convert 5'-triphosphate to 5'-monophosphate ends, and then treated with or without  
771 Terminator™ enzyme to degrade only RNAs with a 5'-monophosphate. Human tRNA valine (**C**)  
772 and human 5S rRNA (**D**) 5' end characterization: enzymatic products indicated were resolved by  
773 SDS-PAGE and northern blots tested with probes specific to host tRNA or 5S rRNA transcripts  
774 (left). Densities of the resulting bands were normalized to an ethidium bromide stained 5S rRNA  
775 loading control. Relative band density was calculated as a fold change of the untreated RNA  
776 population, which was set to 1, and displayed as heat maps (right). Heat maps represent n = 4 for  
777 tRNA and n = 3 for 5S rRNA.  
778

γHV ncRNAs share conserved features

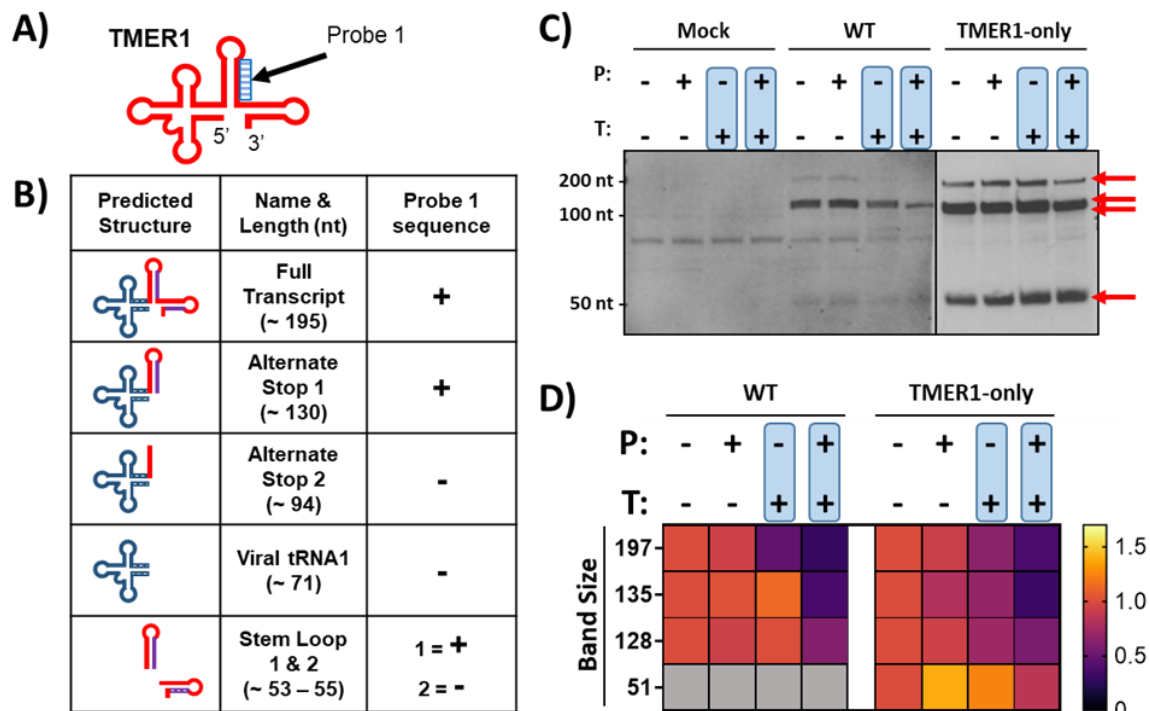

779

780 **Figure 2. RNA end characterization indicates TMER1 derived RNAs with 5'-triphosphate**  
 781 **ends.**

782 **A)** Schematic of the predicted secondary structure of TMER1 with sequence for northern  
 783 TMER1 probe 1 indicated at the 3' side of stem loop 1. **B)** TMER1 primary and processed  
 784 forms: predicted structures in left column, name and length in center, and TMER1 probe 1  
 785 sequence in right column (“+” indicates sequence present; “-” indicates sequence not contained).  
 786 The tRNA-like loop is shown in blue, and TMER1 miRNAs in purple. **C)** Following sequential  
 787 enzymatic treatments as detailed in Figure 1B, small RNAs were resolved by SDS-PAGE then  
 788 detected by northern blot with TMER1 probe 1. Blot is representative of three independent  
 789 experiments. RNA bands detected only during infection and specific to TMER1 are marked with  
 790 red arrows, in contrast to non-specific bands shared with mock infected samples. **D)** Densities of  
 791 the TMER1 northern blot bands were normalized to an ethidium bromide stained 5S rRNA  
 792 loading control. Relative density of bands were calculated as a fold change of the untreated RNA



## $\gamma$ HV ncRNAs share conserved features

793 population, which was set to 1, and presented as heat maps. Band sizes were calculated as  
794 averages based on migration of a ladder included in each experiment. RNA bands not detectable  
795 in WT  $\gamma$ HV68 infection are shown as gray boxes. Data is from three independent experiments.  
796

$\gamma$ HV ncRNAs share conserved features

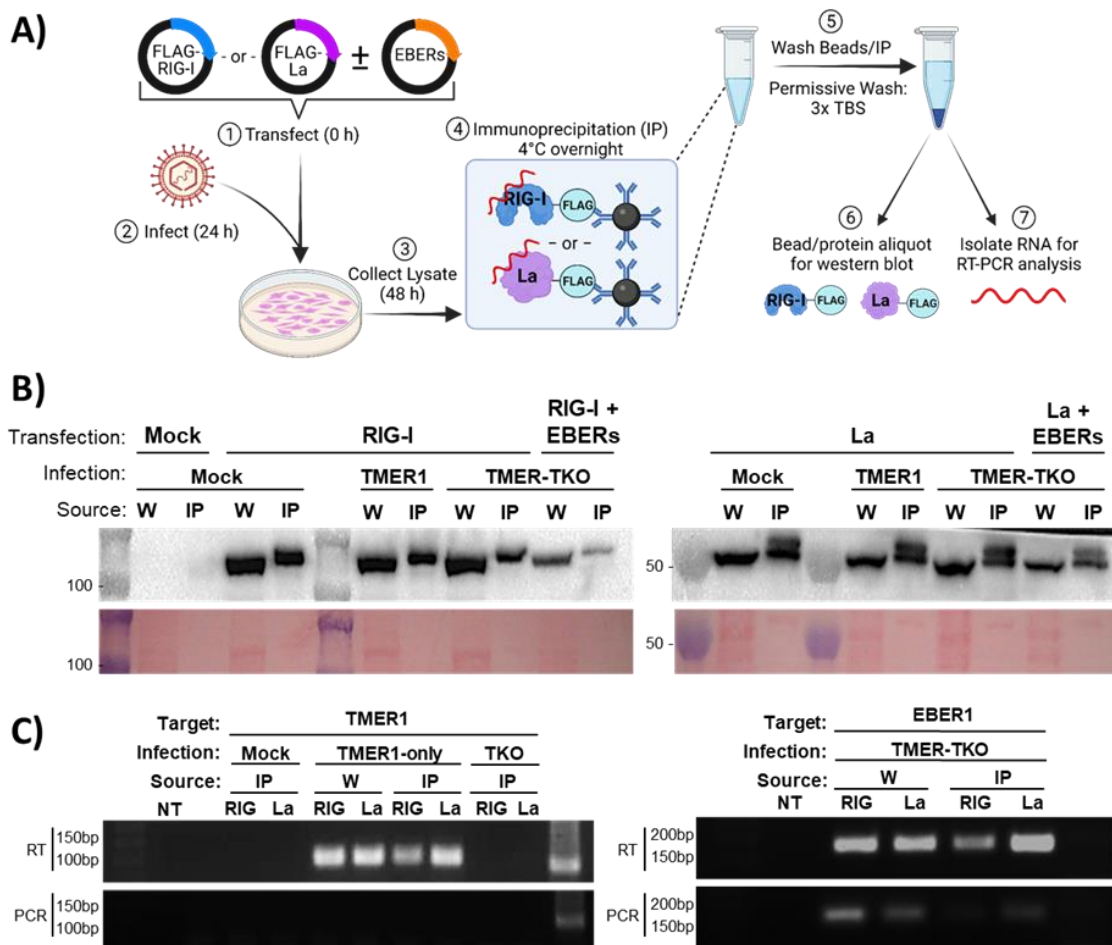

797

798 **Figure 3. FLAG-mediated immunoprecipitation of RNA binding proteins and associated**  
 799 **RNAs under permissive conditions.**

800 **A)** Experimental design to study ncRNA interactions with RIG-I and La. HEK 293 cells were  
 801 transfected with FLAG-tagged proteins of interest; RIG-I or La. For EBER interaction analysis,  
 802 cells were also transfected with a plasmid expressing both EBER1 and EBER2 (pSP73-EBERs).  
 803 24 hours after transfection, cells were infected with mock, WT, TMER1-only, or TMER-TKO  
 804  $\gamma$ HV68 at an MOI of 5. 24 hpi (48 hours post-transfection), immunoprecipitation was performed,  
 805 followed by “permissive wash” with TBS. An aliquot of beads was reserved for western blot  
 806 analysis (B) and RNA was isolated from the remaining beads for RT-PCR (C). **B)** Proteins from  
 807 whole cell lysate (W) or immunoprecipitation beads (IP) were resolved by SDS-PAGE and

## $\gamma$ HV ncRNAs share conserved features

808 detected by western blot with a primary antibody targeting FLAG for RIG-I-FLAG (left) or La-  
809 FLAG (right) transfected samples. Ladder shows protein size in kDa. Ponceau red stained blots,  
810 below, demonstrate enrichment by IP. Blots are representative of two independent experiments  
811 with technical triplicates. C) RNA was isolated from whole cell lysate (W) or  
812 immunoprecipitated (IP) samples from cells transfected with RIG-I-FLAG (RIG) or La-FLAG  
813 (La). Primers targeting TMER1 (left) or EBER1 (right) were used for RT-PCR with 40 cycles.  
814 PCR without reverse transcription (“PCR”) was performed in conjunction with RT-PCR to test  
815 for DNA contamination. Data are representative of two independent experiments with technical  
816 duplicates or triplicates.  
817

$\gamma$ HV ncRNAs share conserved features

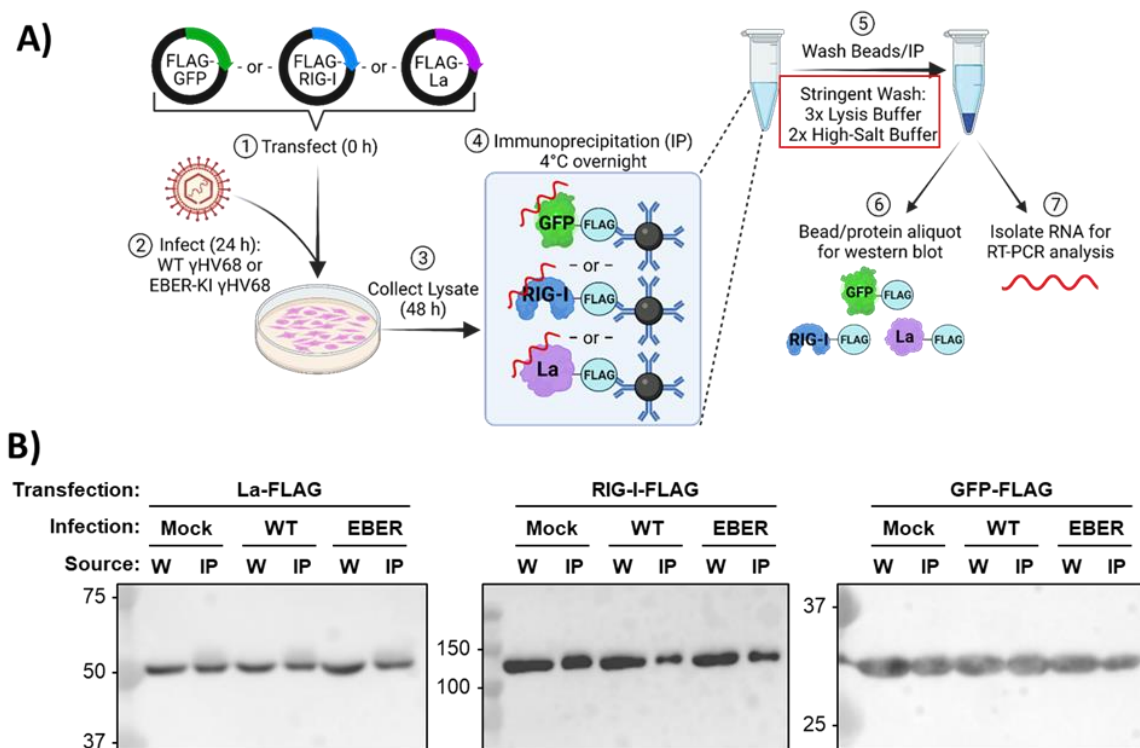

818

819 **Figure 4. Modified immunoprecipitation experiment with a more stringent wash**  
 820 **successfully isolates FLAG-tagged proteins of interest.**

821 **A)** Modified experimental design to detect ncRNA interactions with RIG-I and La. Experiment  
 822 was performed as previously described (Figure 3) with the following modifications. HEK 293  
 823 cells were transfected with FLAG-tagged RIG-I, La, or GFP as a non-specific binding control.  
 824 24 hours after transfection, cells were infected with WT or EBER-knock in (EBER-KI)  $\gamma$ HV68.  
 825 Immunoprecipitation was performed as before, followed with a “stringent” wash of beads  
 826 (outlined in red box) prior to protein analysis and RNA isolation as before. **B)** Proteins from  
 827 whole cell lysates (W) or immunoprecipitated beads (IP) were resolved by SDS-PAGE and  
 828 western blot analysis was performed with a primary antibody targeting FLAG. Proteins were  
 829 analyzed in mock, WT  $\gamma$ HV68 infection (WT), or EBER-KI  $\gamma$ HV68 infection (EBER). Protein  
 830 ladder is indicated to the left of each blot (kDa). Expected approximate protein sizes: La = 47  
 831 kDa, RIG-I = 102 kDa, GFP = 27 kDa.

$\gamma$ HV ncRNAs share conserved features

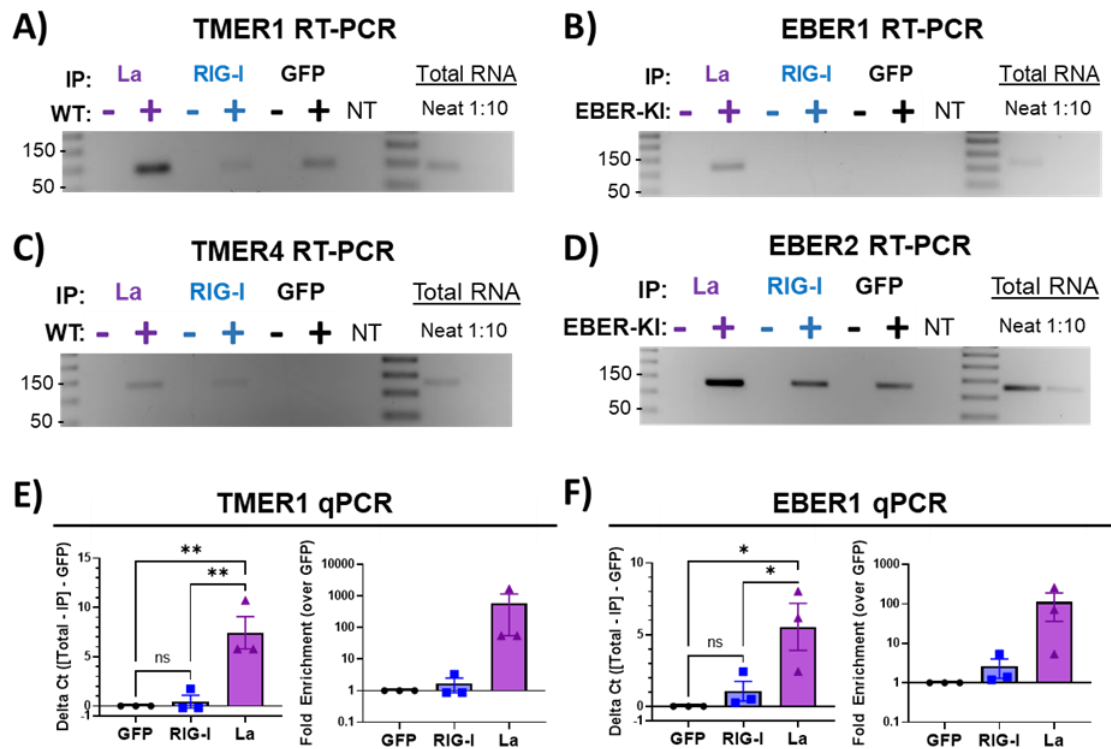

832

833 **Figure 5. FLAG-mediated immunoprecipitation of RNA binding proteins and associated**  
 834 **RNAs under stringent conditions.**

835 RNA was isolated from immunoprecipitation complexes as previously described. RT-PCR for  
 836 TMER1 (A), EBER1 (B), TMER4 (C), and EBER2 (D) was limited to 30 cycles or 33 cycles  
 837 (TMER4) to detect enrichment of the target RNA in IP samples compared to a neat and diluted  
 838 total RNA positive control. Numbers to the left of each gel indicate ladder sizes (bp).

839 Quantitative analysis was performed by RT-qPCR for TMER1 and EBER1. The  $\Delta$ Ct for TMER1  
 840 (E) and EBER1 (F) interacting with RIG-I or La was calculated as: (Total Target Ct – IP Target  
 841 Ct) – (Total GFP Ct – IP GFP Ct), where “target” refers to RIG-I or La.  $\Delta$ Ct for GFP equals 0,  
 842 while positive values indicate enrichment and negative values indicate diminishment of RNA  
 843 interaction with target proteins, respectively. Fold enrichment for TMER1 (E) or EBER1 (F) was  
 844 calculated as  $2^{\Delta Ct}$ , where ncRNA detected with GFP is set to 1. Error bars = SEM. Significant

## $\gamma$ HV ncRNAs share conserved features

845 differences analyzed by one-way ANOVA with multiple comparisons and indicated as asterisks.

846 P-values are indicated as follows: \* =  $P \leq 0.05$ , \*\* =  $P \leq 0.01$ .

847

$\gamma$ HV ncRNAs share conserved features

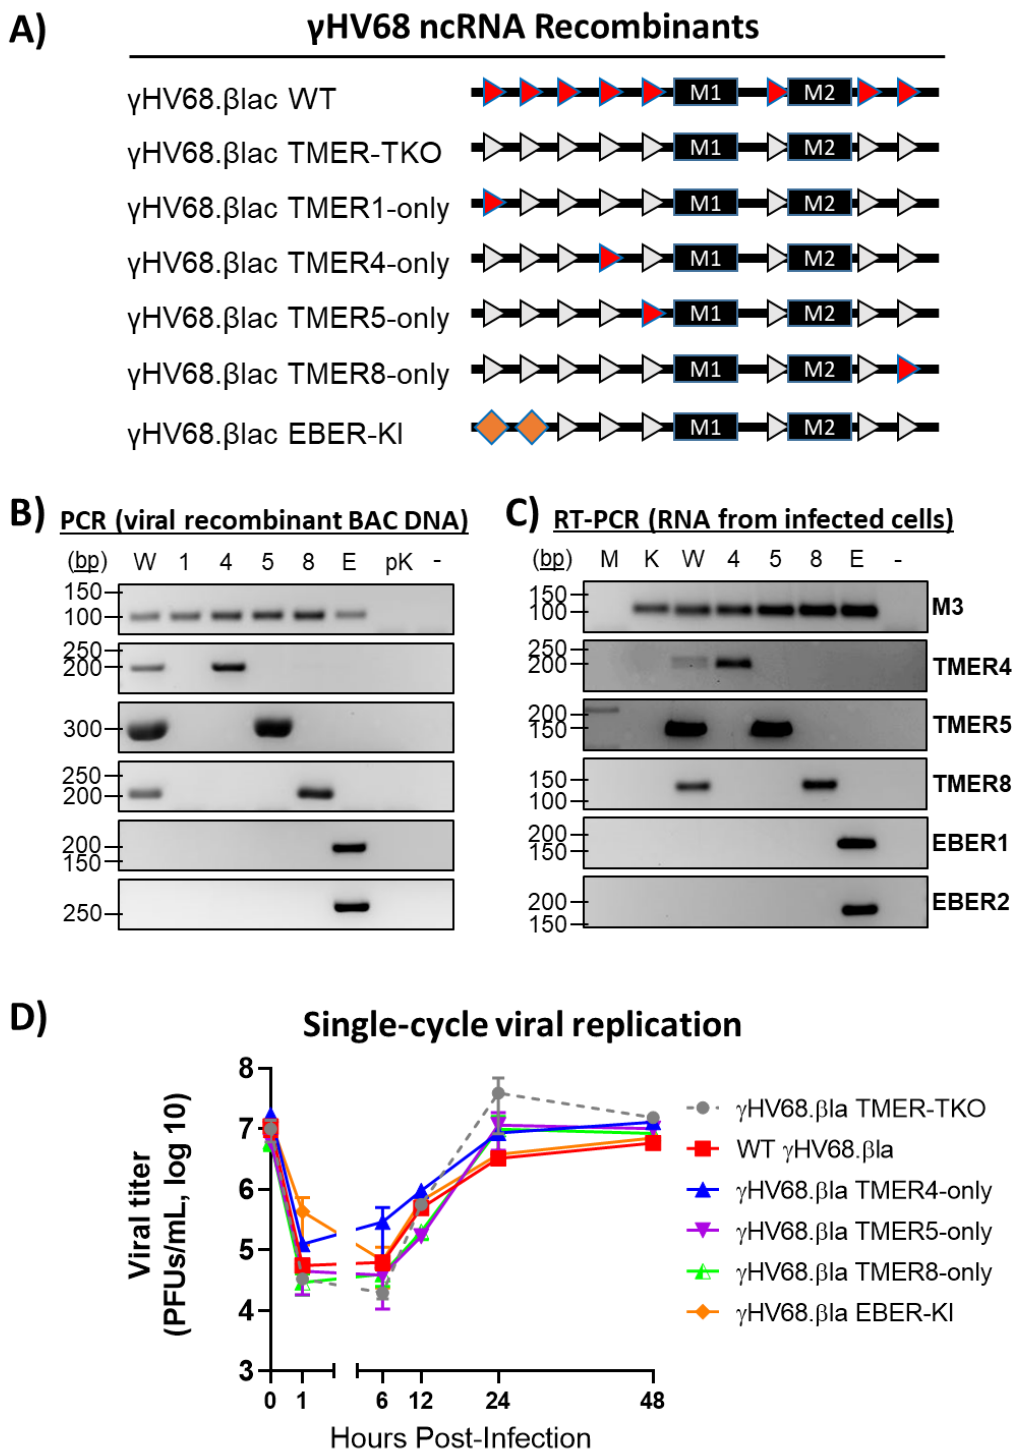

848

849 **Figure 6. Characterization of  $\gamma$ HV68 ncRNA recombinants.**

850 A) Schematics representing genetic details of the  $\gamma$ HV68 ncRNA recombinants. Line diagrams

851 represent the first 6 kilobases of the  $\gamma$ HV68 genome, including the M1 and M2 genes (black

## $\gamma$ HV ncRNAs share conserved features

852 rectangles). Each intact TMER gene is depicted as a red triangle. Gray triangles represent  
853 TMERs that are not expressed due to promoter deletion as previously described (7). Orange  
854 diamonds represent the expression of EBERs in place of TMERs through knock-in of the EBER1  
855 and EBER2 sequences into the left end of the  $\gamma$ HV68 genome (EBER knock-in; EBER-KI). **B)**  
856 PCR of viral recombinant DNA. W = WT  $\gamma$ HV68, 1 = TMER1-only  $\gamma$ HV68, 4 = TMER4-only  
857  $\gamma$ HV68, 5 = TMER5-only  $\gamma$ HV68, 8 = TMER8-only  $\gamma$ HV68, E = EBER-KI  $\gamma$ HV68, pK = pLE—  
858 TMER-TKO plasmid as previously described ((7); does not contain M3), “-” = no-template  
859 control. Targets listed to the right of PCR panels. **C)** RT-PCR of RNA collected from HEK 293  
860 cells infected with  $\gamma$ HV68 recombinants at an MOI of 1. Viruses indicated as in B, except M =  
861 mock and K = TMER-TKO  $\gamma$ HV68 (expresses M3). Targets for B and C listed to the right of  
862 PCR panels. PCR without reverse transcription was run with the same conditions as each RT-  
863 PCR to confirm the absence of DNA contamination (not shown). Some product sizes differ than  
864 the same target in (B) due to the use of different primers better suited to RT-PCR analysis. **D)**  
865 Single step replication analysis with WT  $\gamma$ HV68 (red squares) or recombinants in 3T12 cells at  
866 an MOI of 5. Other viral recombinants shown are TMER-TKO (gray circles, dashed line),  
867 TMER4-only (blue triangles), TMER5-only (flipped purple triangles), TMER8-only (half-filled  
868 green triangles), and EBER-KI (orange diamonds). Cells and supernatants were collectively  
869 harvested at the indicated times post-infection, then quantified by plaque assay. Data depict the  
870 mean of 3 biologic replicates within a single experiment. Error bars = SEM.  
871



$\gamma$ HV68 ncRNAs share conserved features

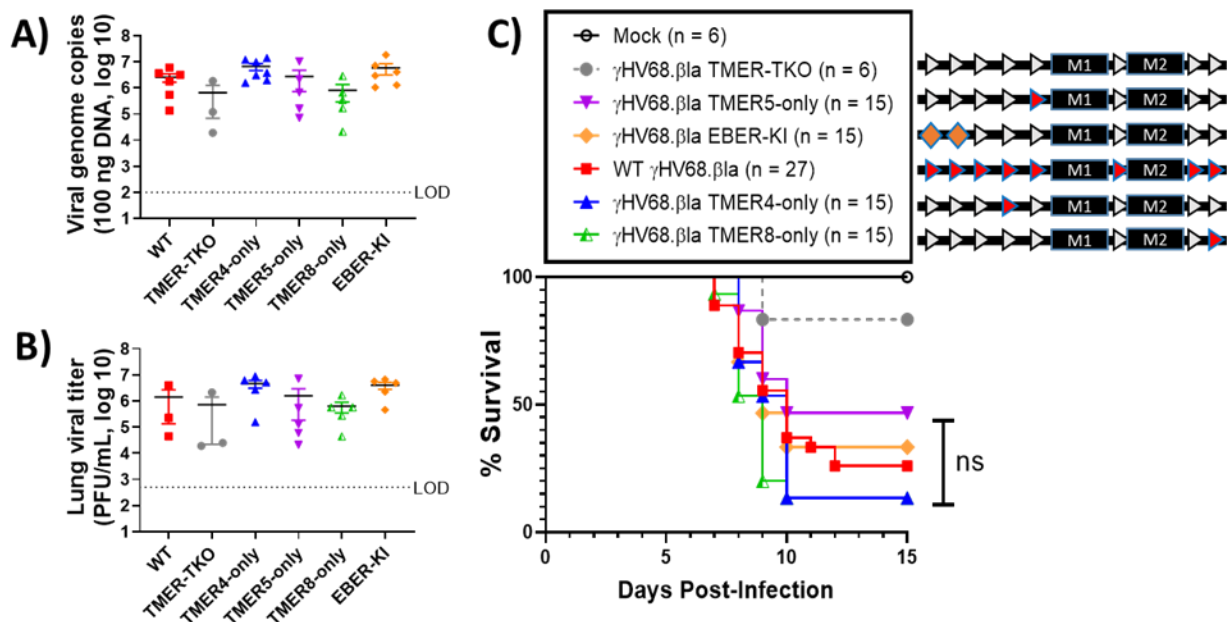

872

873 **Figure 7. Infection of immunocompromised mice with  $\gamma$ HV68 ncRNA recombinants reveal**  
 874 **conserved virulence of TMERs and the EBERs.**

875 BALB/c IFN $\gamma$  <sup>-/-</sup> mice were infected with a panel of  $\gamma$ HV68 ncRNA recombinants. At 8 days

876 p.i., lung tissue was collected for viral titer analysis by (A) qPCR for viral DNA (gB gene) and

877 (B) plaque assay quantitation of infectious virus. Limit of detection (LOD) is indicated by a

878 horizontal dashed line on each graph. Virus was not detected in mock-infected tissue samples in

879 each analysis. Individual symbols represent the value from an individual mouse. Three mice

880 were analyzed for WT and TMER-TKO  $\gamma$ HV68, and five mice were analyzed for all other

881 viruses. Horizontal black lines indicate the mean of each group. One-way ANOVA analysis with

882 multiple comparisons of each  $\gamma$ HV68 recombinant to WT  $\gamma$ HV68 detected no significant

883 difference. C) Analysis of BALB/c IFN $\gamma$  <sup>-/-</sup> mice following infection with WT or recombinant

884  $\gamma$ HV68 monitored for signs of morbidity over the course of 15 days. The number of mice in each

885 group is indicated. Statistical analysis of survival curves was done by log-rank (Mantel-Cox) test

886 with pairwise comparisons of recombinant viruses and WT  $\gamma$ HV68.β1a. P-values for survival

## $\gamma$ HV ncRNAs share conserved features

887 following infection with each recombinant except TMER-TKO compared to WT virus are all  
888 greater than 0.05 (not significantly different, “ns”); TMER-TKO = 0.025, TMER4-only = 0.47,  
889 TMER5-only = 0.21, TMER8-only = 0.14, EBER-KI = 0.79.  
890

$\gamma$ HV ncRNAs share conserved features

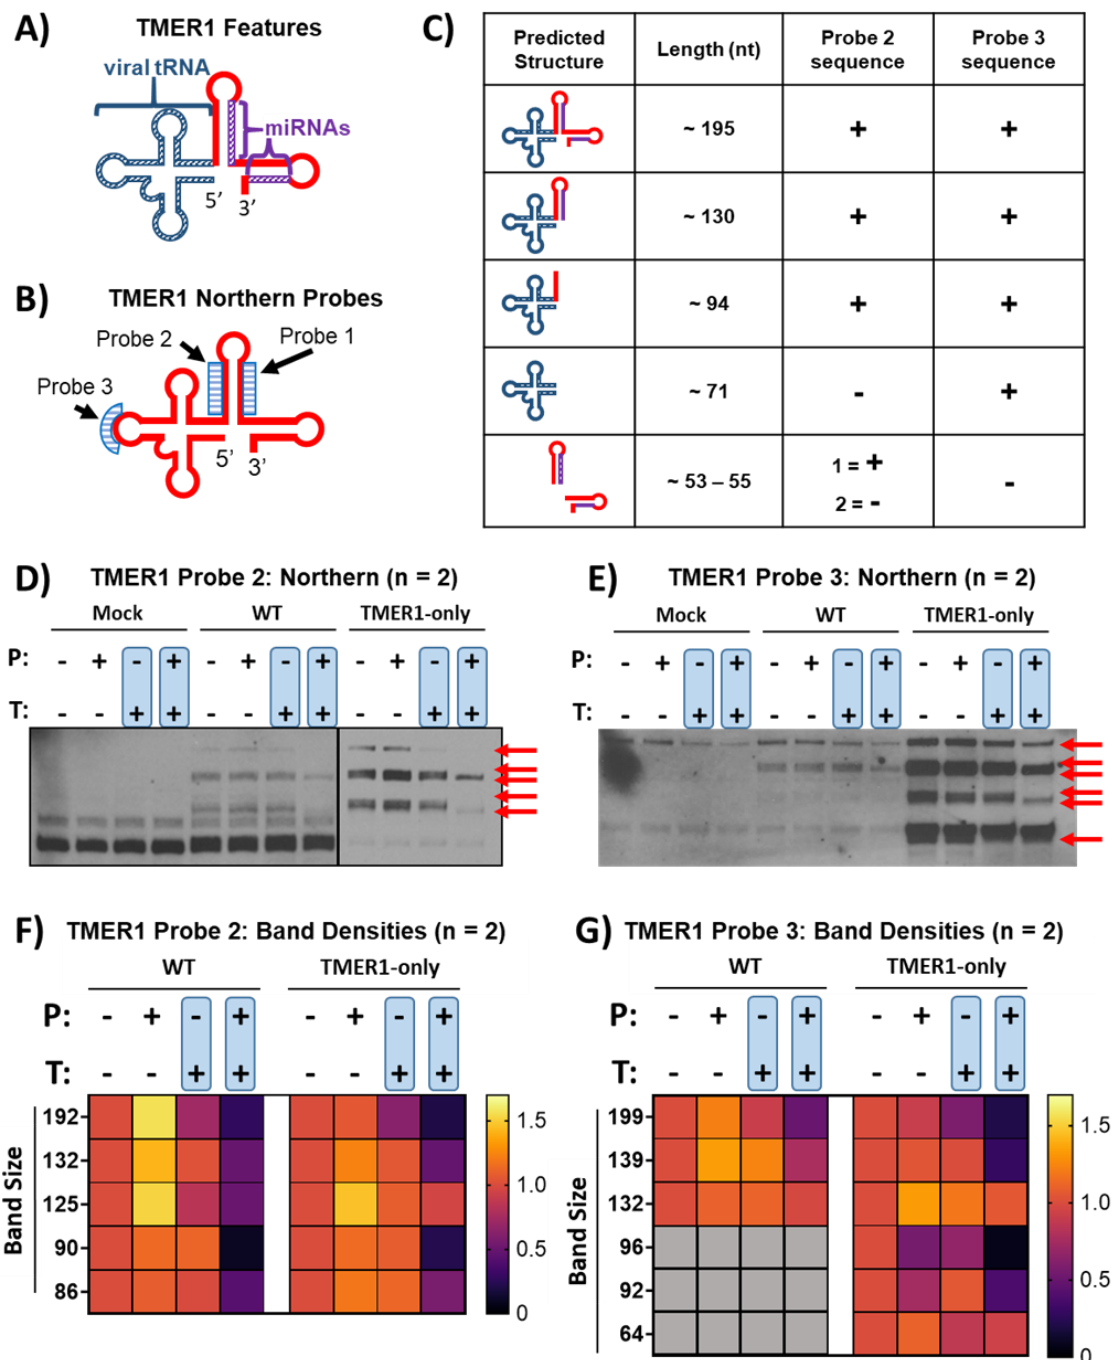

891

892 **Figure S1. Multiple distinct TMER probes detect 5'-triphosphate on TMER1 RNAs.**

893 **A)** Schematic of features of TMER1 RNA. The TMER1 predicted structure consists of a tRNA-

894 like loop (dark blue) and multiple stem loops that are processed into biologically active miRNAs

895 (purple). **B)** Schematic of northern probe sequences used to detect TMER1. Different northern

## $\gamma$ HV ncRNAs share conserved features

896 probes (light blue boxes) bind to various regions of TMER1 RNA, allowing detection of  
897 alternate, processed forms. **C)** Table showing the multiple possible alternate forms of TMER1  
898 with varying lengths. The two probe sequences shown here (Probe 2 and Probe 3) are present in  
899 some TMER1 forms (+), but not others (-). Following sequential enzymatic treatments (P = RNA  
900 5'-polyphosphatase, T = Terminator™), small RNAs were resolved by SDS-PAGE gel and  
901 northern blot was performed with TMER1 Probe 2 (**D**) or Probe 3 (**E**). The RNA bands specific  
902 to TMER1 are marked with red arrows. Band densities for the TMER1 RNAs detected by  
903 TMER1 probe 2 (**F**) and TMER1 probe 3 (**G**). Densities of the TMER1 northern blot bands were  
904 normalized to a 5S rRNA loading control stained with ethidium bromide. Relative density of  
905 bands were calculated as a fold change of the untreated RNA population, which was set to 1, and  
906 presented as heat maps. Band sizes were calculated as averages based on migration of a ladder  
907 included in each experiment. RNA bands not consistently detectable in WT  $\gamma$ HV68 infection are  
908 shown as gray boxes. Data for each probe is from two independent experiments.  
909

γHV ncRNAs share conserved features

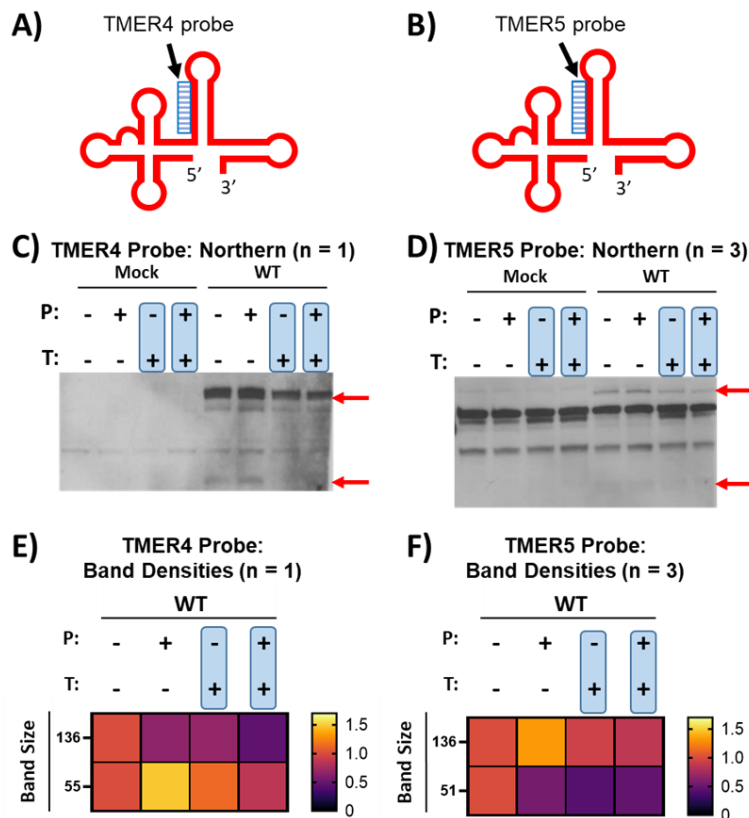

910

911 **Figure S2. 5' RNA end characterization of TMER4 and TMER5.**

912 Predicted secondary structures for TMER4 (A) and TMER5 (B). The sequence for northern  
 913 probes used to detect each TMER (light blue boxes) is present in the 5' end of the first stem loop  
 914 of the individual TMERs. Following sequential enzymatic treatments (P = RNA 5'-  
 915 polyphosphatase, T = Terminator<sup>TM</sup>), small RNAs were resolved by SDS-PAGE gel and northern  
 916 blot was performed with probes for TMER4 (C) or TMER5 (D). The RNA bands specific to  
 917 TMER4 or TMER5 are marked with red arrows. Band densities for the RNAs detected by probes  
 918 targeting TMER4 (E) and TMER5 (G). Densities were normalized as previously described and  
 919 presented as heat maps. Analysis was performed in one experiment (TMER4) or three  
 920 independent experiments (TMER5).

$\gamma$ HV ncrRNAs share conserved features

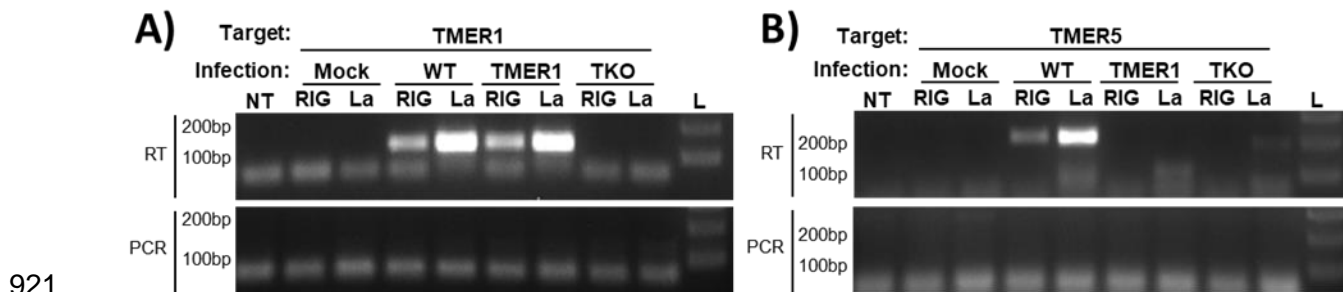

921

922 **Figure S3. Immunoprecipitation of FLAG-tagged proteins indicates multiple TMERs**

923 **interact with host proteins.**

924 HEK 293 cells were transfected with FLAG-tagged RIG-I or La, then infected with WT,

925 TMER1-only (TMER1), or TMER-TKO (TKO)  $\gamma$ HV68 as previously described. Whole cell

926 lysates were collected 24 hpi and used for immunoprecipitation of FLAG-tagged RIG-I or La.

927 RNA was isolated from immunoprecipitated complexes and analyzed by RT-PCR with primers

928 targeting TMER1 (A) or TMER5 (B). PCR without reverse transcription (“PCR”) was performed

929 in conjunction with RT-PCR to test for DNA contamination. NT = non-template control, L =

930 ladder. Data are representative of one experiment with technical triplicates (TMER1) or

931 duplicates (TMER5).

932
